# Supplementary material for: Design, synthesis and biological evaluation of new eugenol derivatives containing 1,3,4-oxadiazole as novel inhibitors of thymidylate synthase
Source: Royal Society of Chemistry journal article supplement (doi:10.1039/d2nj05711e), 2023-01-01
Supplement: d2nj05711e1.pdf [file d2nj05711e1.pdf]

## SUPPLEMENTARY MATERIAL

### Design, Synthesis and Biological Evaluation of new Eugenol derivatives containing 1,3,4-oxadiazole as novel inhibitors of Thymidylate Synthase

#### <sup>1</sup>H NMR spectra of compounds 6-19

This report was created by ACD/NMR Processor Academic Edition. For more information go to [www.acdlabs.com/nmrproc/](http://www.acdlabs.com/nmrproc/)

|                        |                                                                                                                         |                      |                                |                  |                         |
|------------------------|-------------------------------------------------------------------------------------------------------------------------|----------------------|--------------------------------|------------------|-------------------------|
| Acquisition Time (sec) | 6.5534                                                                                                                  | Comment              | 1D-1H-"PowerScan"              | Date             | 2022/03/08 13:00:32.978 |
| Date Stamp             | 2022/03/08 13:00:32.978                                                                                                 |                      |                                |                  | 3/19/2022 2:52:46 PM    |
| File Name              | C:\Users\Hp\Desktop\EU NMR Azizah\DrAzizah NMREUTrisazole and EUOX-S-Alky\130032-1D PROTON-EUT-8_CDCI3_AZIZA\nmr_fid.dx |                      |                                |                  |                         |
| Frequency (MHz)        | 80.32                                                                                                                   | Nucleus              | <sup>1</sup> H                 | Origin           | SPA3310 at Magritek     |
| Original Points Count  | 32768                                                                                                                   | Owner                | Copyright (C) 2022 by Magritek |                  |                         |
| Points Count           | 262144                                                                                                                  | Spectrum Offset (Hz) | 381.1301                       | Sweep Width (Hz) | 5000.15                 |

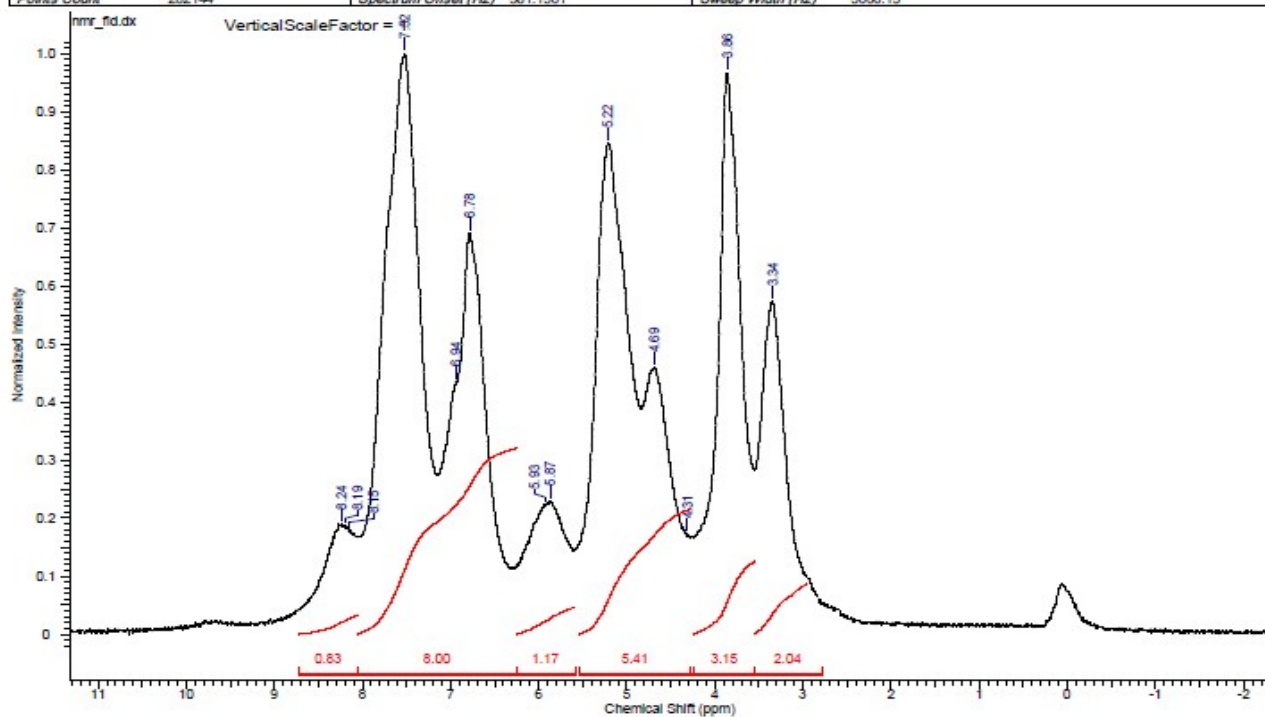

<sup>1</sup>H NMR spectrum of compound 6

|                        |                                                                                                                           |                      |                                |                  |                         |
|------------------------|---------------------------------------------------------------------------------------------------------------------------|----------------------|--------------------------------|------------------|-------------------------|
| Acquisition Time (sec) | 6.5534                                                                                                                    | Comment              | 1D-1H-"PowerScan"              | Date             | 2022/03/07 14:31:41.366 |
| Date Stamp             | 2022/03/07 14:31:41.366                                                                                                   |                      |                                |                  |                         |
| File Name              | C:\Users\Hpi\Desktop\EU NMR Azizah\DrAzizah NMR\EU-Triazole and EUOX-S-Alkyl\143140-1D PROTON-EUT-2_Aziza_CDCl3nmr_fid.dx |                      |                                |                  |                         |
| Frequency (MHz)        | 80.32                                                                                                                     | Nucleus              | 1H                             | Origin           | SPA3310 at Magritek     |
| Original Points Count  | 32768                                                                                                                     | Owner                | Copyright (C) 2022 by Magritek |                  |                         |
| Points Count           | 65536                                                                                                                     | Spectrum Offset (Hz) | 381.0942                       | Sweep Width (Hz) | 5000.15                 |

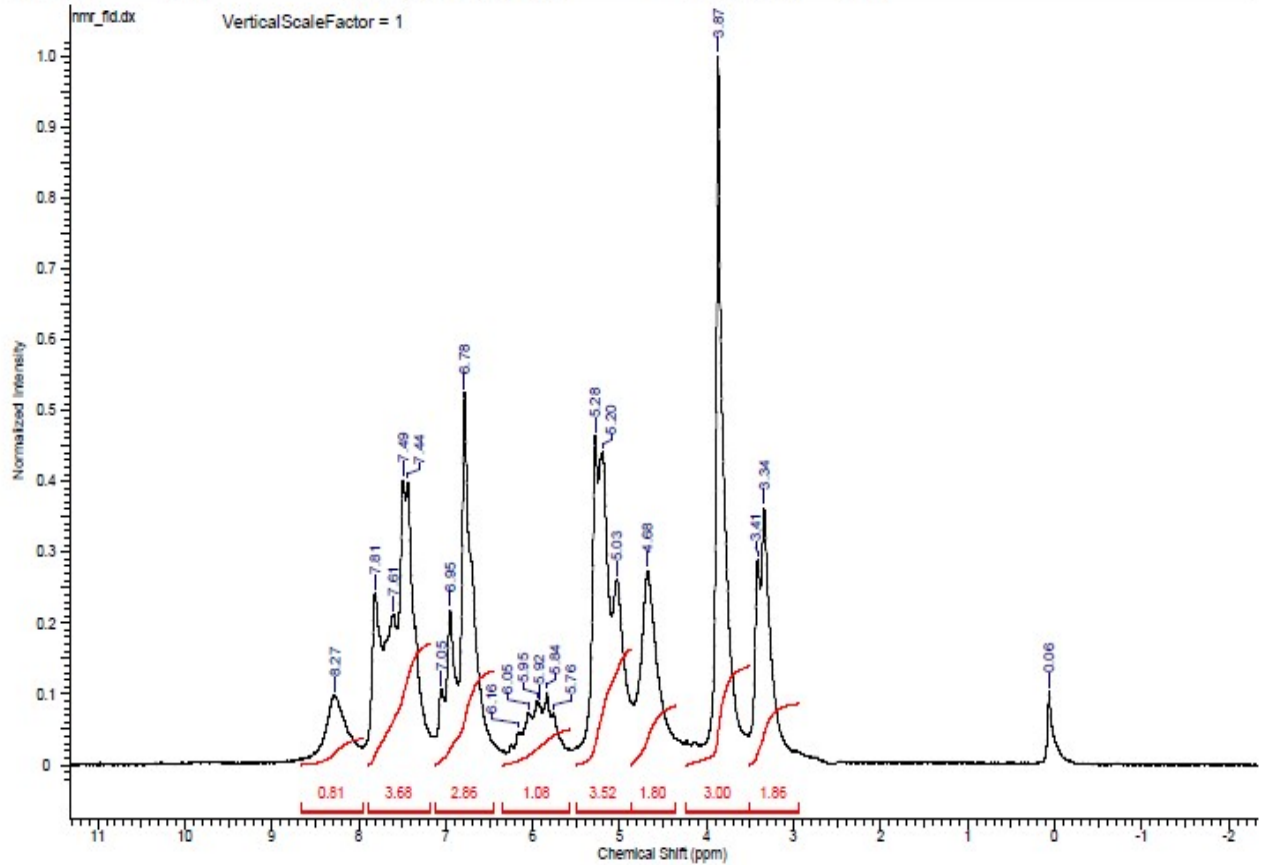

$^1\text{H}$  NMR spectrum of compound **7**

|                        |                                                                                                                          |                      |                                |                  |                         |
|------------------------|--------------------------------------------------------------------------------------------------------------------------|----------------------|--------------------------------|------------------|-------------------------|
| Acquisition Time (sec) | 6.5534                                                                                                                   | Comment              | 1D-1H-"PowerScan"              | Date             | 2022/03/09 13:43:46.135 |
| Date Stamp             | 2022/03/09 13:43:46.135                                                                                                  |                      |                                |                  |                         |
| File Name              | C:\Users\Hp\Desktop\EU NMR Azizah\DrAzizah NMR\EUTrizole and EUOX-S-Alkyl\134345-1D PROTON-EUT-11 CDCI3 AZIZA\nmr_fid.dx |                      |                                |                  |                         |
| Frequency (MHz)        | 80.32                                                                                                                    | Nucleus              | 1H                             | Origin           | SPA3310 at Magritek     |
| Original Points Count  | 32768                                                                                                                    | Owner                | Copyright (C) 2022 by Magritek |                  |                         |
| Points Count           | 65536                                                                                                                    | Spectrum Offset (Hz) | 381.0701                       | Sweep Width (Hz) | 5000.15                 |

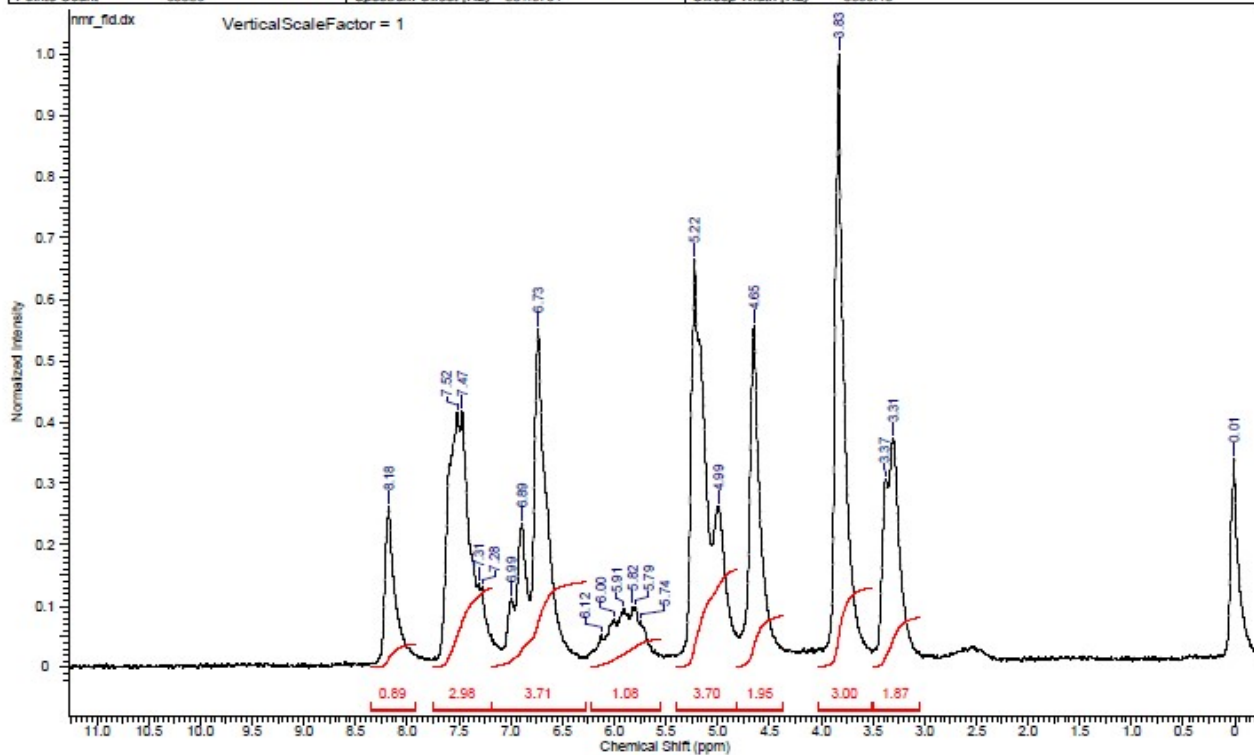

<sup>1</sup>H NMR spectrum of compound **8**

|                        |                                                                                                                       |                      |                                 |                  |                         |
|------------------------|-----------------------------------------------------------------------------------------------------------------------|----------------------|---------------------------------|------------------|-------------------------|
| Acquisition Time (sec) | 6.5534                                                                                                                | Comment              | 1D-1H- <sup>1</sup> H-PowerScan | Date             | 2022/03/08 09:53:18.671 |
| Date Stamp             | 2022/03/08 09:53:18.671                                                                                               |                      |                                 |                  |                         |
| File Name              | C:\Users\Hp\Desktop\EU NMR Azizah\DrAzizah NMR\EUTriazole and EUOX-S-Alky\095317-1D PROTON-EUT-9 CDCG AZIZA\nmr_fd.dx |                      |                                 |                  |                         |
| Frequency (MHz)        | 80.32                                                                                                                 | Nucleus              | 1H                              | Origin           | SPA3310 at Magritek     |
| Original Points Count  | 32768                                                                                                                 | Owner                | Copyright (C) 2022 by Magritek  |                  |                         |
| Points Count           | 65536                                                                                                                 | Spectrum Offset (Hz) | 380.6982                        | Sweep Width (Hz) | 5000.15                 |

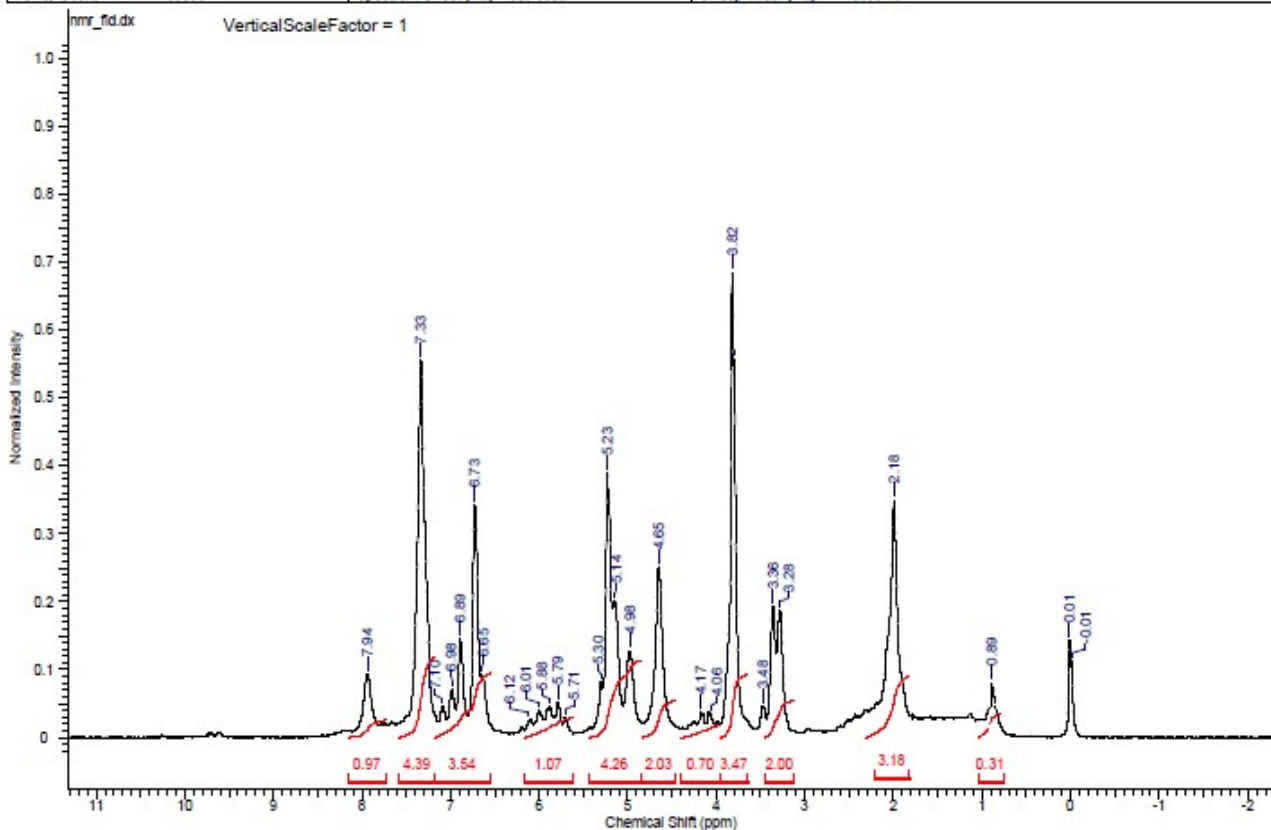

<sup>1</sup>H NMR spectrum of compound **9**

|                        |                                                                                                                           |                      |                                |                  |                         |
|------------------------|---------------------------------------------------------------------------------------------------------------------------|----------------------|--------------------------------|------------------|-------------------------|
| Acquisition Time (sec) | 6.5534                                                                                                                    | Comment              | 1D-1H-"PowerScan"              | Date             | 2022/03/08 13:37:17.577 |
| Date Stamp             | 2022/03/08 13:37:17.577                                                                                                   |                      |                                |                  |                         |
| File Name              | C:\Users\Hp\Desktop\EU NMR Azizah\DrAzizah NMR\EUTriazole and EUOX-S-Alkyl\133716-1D PROTON-EUT-10_CDCI3_AZIZA\nmr_fid.dx |                      |                                |                  |                         |
| Frequency (MHz)        | 80.32                                                                                                                     | Nucleus              | 1H                             | Origin           | SPA3310 at Magritek     |
| Original Points Count  | 32768                                                                                                                     | Owner                | Copyright (C) 2022 by Magritek |                  |                         |
| Points Count           | 65536                                                                                                                     | Spectrum Offset (Hz) | 381.1301                       | Sweep Width (Hz) | 5000.15                 |

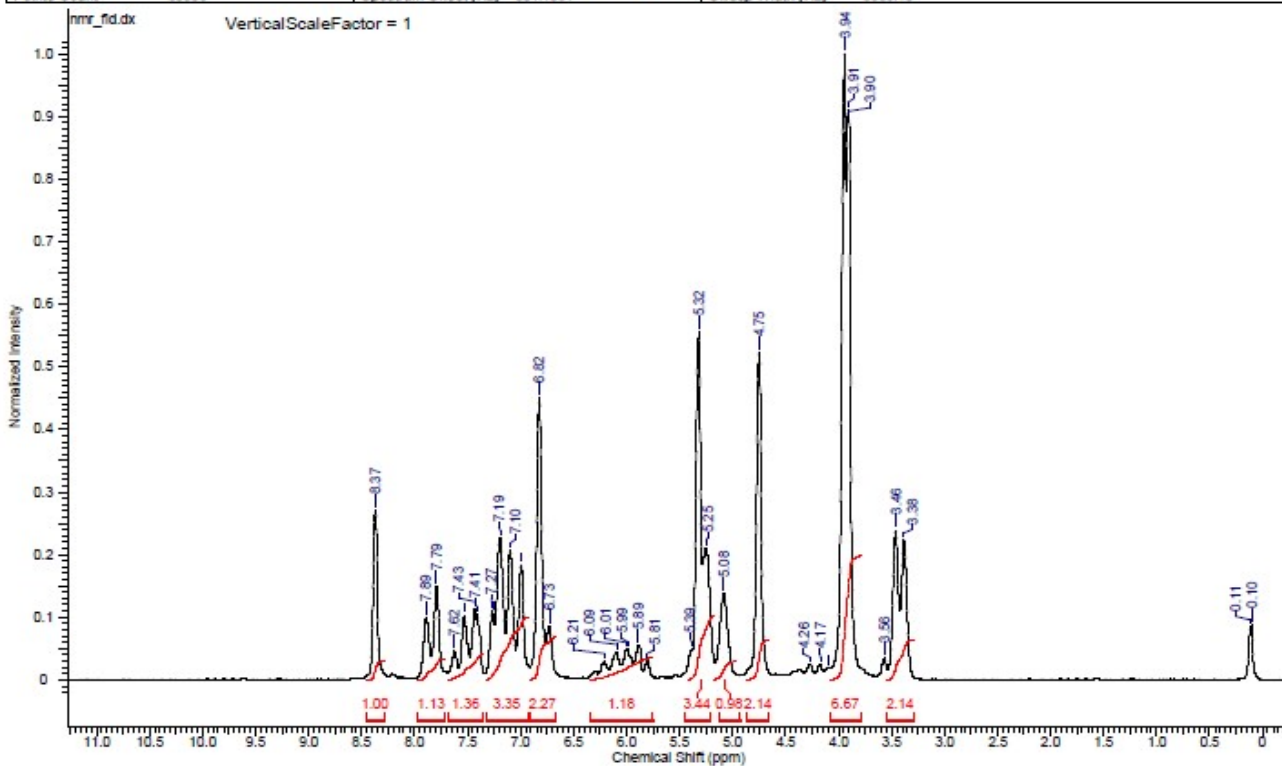

<sup>1</sup>H NMR spectrum of compound 10

|                        |                                                                                                                           |                      |                                |                  |                         |
|------------------------|---------------------------------------------------------------------------------------------------------------------------|----------------------|--------------------------------|------------------|-------------------------|
| Acquisition Time (sec) | 6.5534                                                                                                                    | Comment              | 1D-1H-"PowerScan"              | Date             | 2022/03/08 10:22:51.895 |
| Date Stamp             | 2022/03/08 10:22:51.895                                                                                                   |                      |                                |                  |                         |
| File Name              | C:\Users\Hpl\Desktop\EU NMR Azizah\DrAzizah NMR\EUTriazole and EUOX-S-Alkyl\102250-1D PROTON-EUT-4 CDCI3 AZIZA\nmr_fid.dx |                      |                                |                  |                         |
| Frequency (MHz)        | 80.32                                                                                                                     | Nucleus              | 1H                             | Origin           | SPA3310 at Magritek     |
| Original Points Count  | 32768                                                                                                                     | Owner                | Copyright (C) 2022 by Magritek |                  |                         |
| Points Count           | 65536                                                                                                                     | Spectrum Offset (Hz) | 380.6982                       | Sweep Width (Hz) | 5000.15                 |

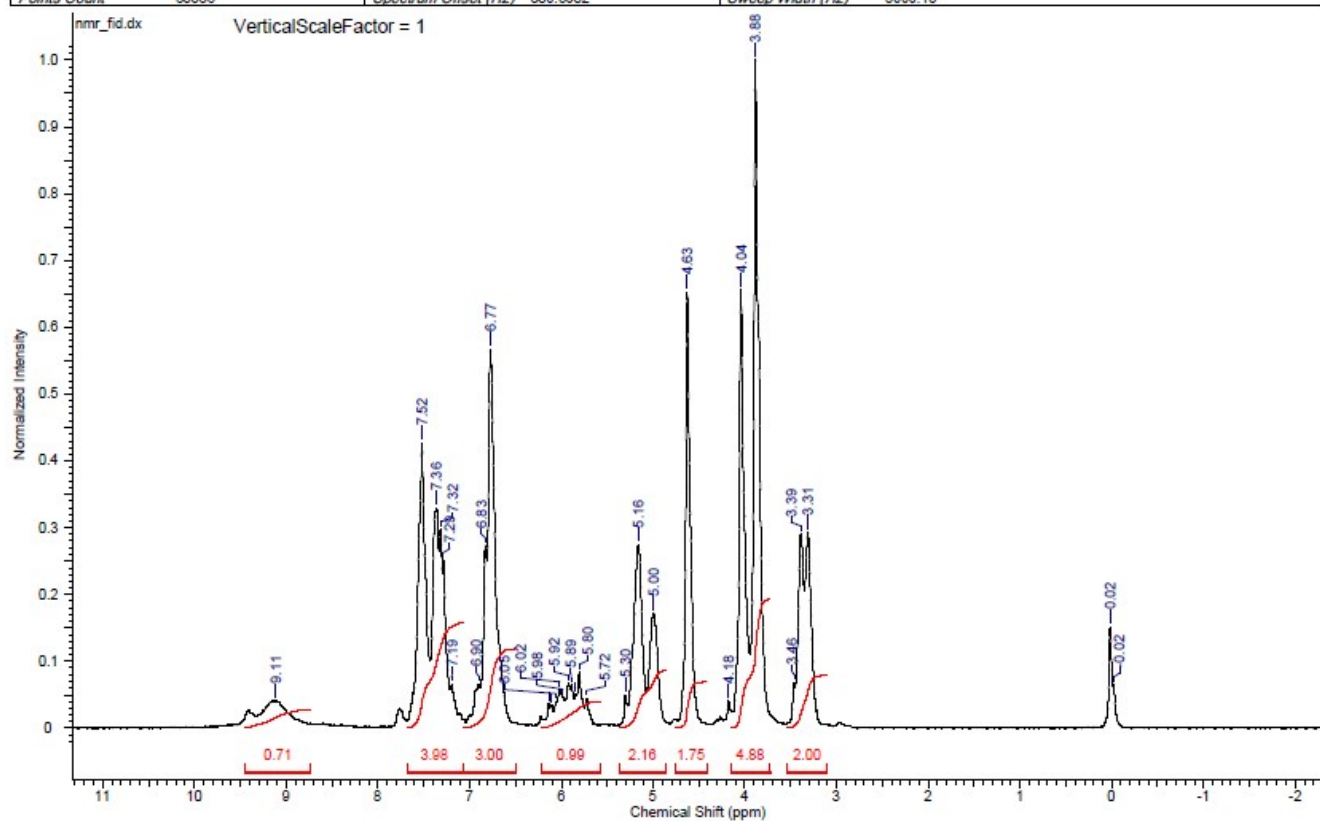

<sup>1</sup>H NMR spectrum of compound **11**

|                        |                                                                                                                          |                      |                                |                  |                         |
|------------------------|--------------------------------------------------------------------------------------------------------------------------|----------------------|--------------------------------|------------------|-------------------------|
| Acquisition Time (sec) | 6.5534                                                                                                                   | Comment              | 1D-1H-"PowerScan"              | Date             | 2022/03/08 12:47:51.219 |
| Date Stamp             | 2022/03/08 12:47:51.219                                                                                                  |                      |                                |                  |                         |
| File Name              | C:\Users\Hp\Desktop\EU NMR Azizah\DrAzizah NMR\EUTriazole and EUOX-S-Alkyl\124750-1D PROTON-EUT-5 CDCl3 AZIZA\nmr_fid.dx |                      |                                |                  |                         |
| Frequency (MHz)        | 80.32                                                                                                                    | Nucleus              | 1H                             | Origin           | SPA3310 at Magritek     |
| Original Points Count  | 32768                                                                                                                    | Owner                | Copyright (C) 2022 by Magritek |                  |                         |
| Points Count           | 65536                                                                                                                    | Spectrum Offset (Hz) | 381.1301                       | Sweep Width (Hz) | 5000.15                 |

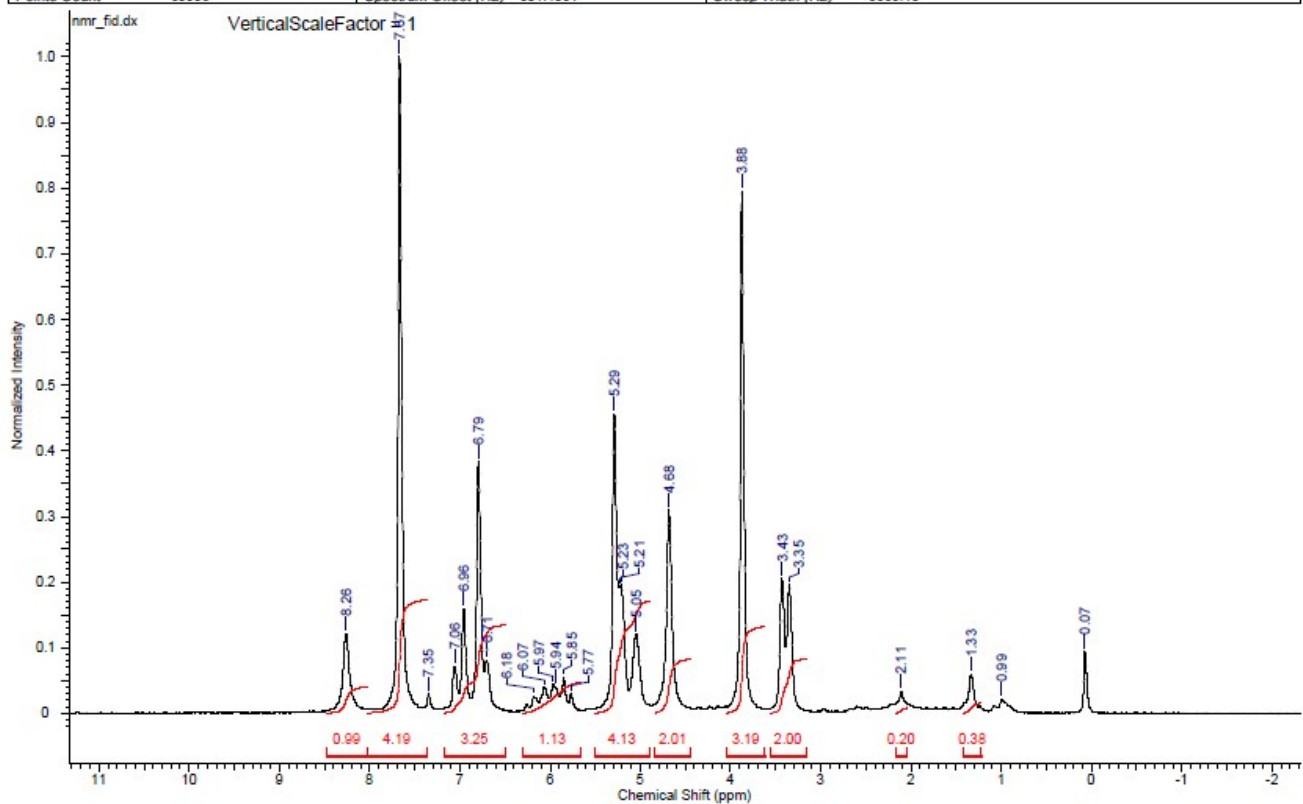

$^1\text{H}$  NMR spectrum of compound **12**

|                        |                                                                                                                               |                      |                                |                  |                         |
|------------------------|-------------------------------------------------------------------------------------------------------------------------------|----------------------|--------------------------------|------------------|-------------------------|
| Acquisition Time (sec) | 6.5534                                                                                                                        | Comment              | 1D-1H-"PowerScan"              | Date             | 2022/03/09 13:58:29.635 |
| Date Stamp             | 2022/03/09 13:58:29.635                                                                                                       |                      |                                |                  |                         |
| File Name              | C:\Users\Hpl\Desktop\EU NMR Azizah\DrAzizah NMR\EUTriazole and EUOX-S-Alkyl\135828-1D PROTON-EUT-6-2nd_CDCl3_AZIZA\nmr_fid.dx |                      |                                |                  |                         |
| Frequency (MHz)        | 80.32                                                                                                                         | Nucleus              | 1H                             | Origin           | SPA3310 at Magritek     |
| Original Points Count  | 32768                                                                                                                         | Owner                | Copyright (C) 2022 by Magritek |                  |                         |
| Points Count           | 65536                                                                                                                         | Spectrum Offset (Hz) | 381.0701                       | Sweep Width (Hz) | 5000.15                 |

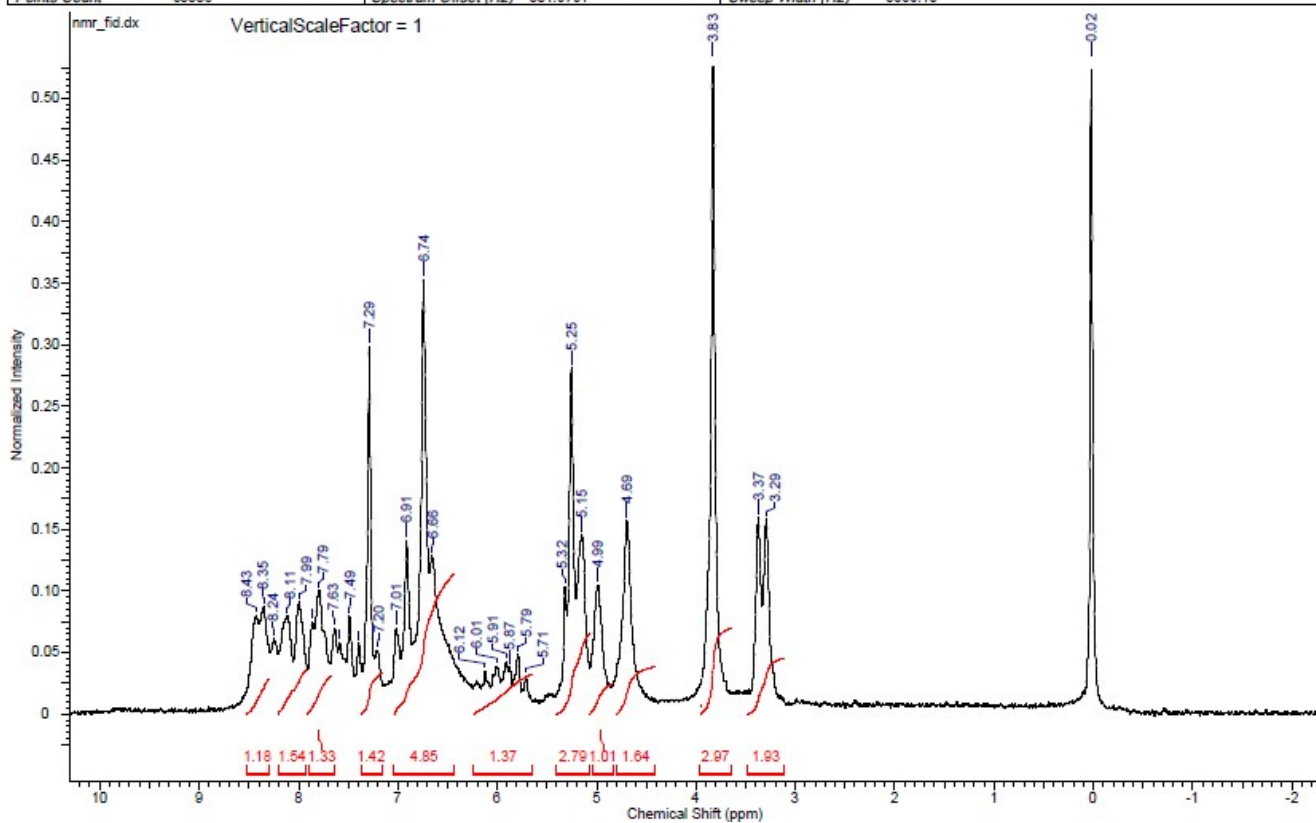

<sup>1</sup>H NMR spectrum of compound **13**



|                        |                                                                                                                          |                      |                                |                  |                         |
|------------------------|--------------------------------------------------------------------------------------------------------------------------|----------------------|--------------------------------|------------------|-------------------------|
| Acquisition Time (sec) | 6.5534                                                                                                                   | Comment              | 1D-1H-"PowerScan"              | Date             | 2022/03/08 10:46:49.298 |
| Date Stamp             | 2022/03/08 10:46:49.298                                                                                                  |                      |                                |                  |                         |
| File Name              | C:\Users\Hp\Desktop\EU NMR Azizah\DrAzizah NMR\EUTriazole and EUOX-S-Alkyl\104648-1D PROTON-EUT-7_CDCI3_AZIZA\nmr_fid.dx |                      |                                |                  |                         |
| Frequency (MHz)        | 80.32                                                                                                                    | Nucleus              | 1H                             | Origin           | SPA3310 at Magritek     |
| Original Points Count  | 32768                                                                                                                    | Owner                | Copyright (C) 2022 by Magritek |                  |                         |
| Points Count           | 65536                                                                                                                    | Spectrum Offset (Hz) | 380.6982                       | Sweep Width (Hz) | 5000.15                 |

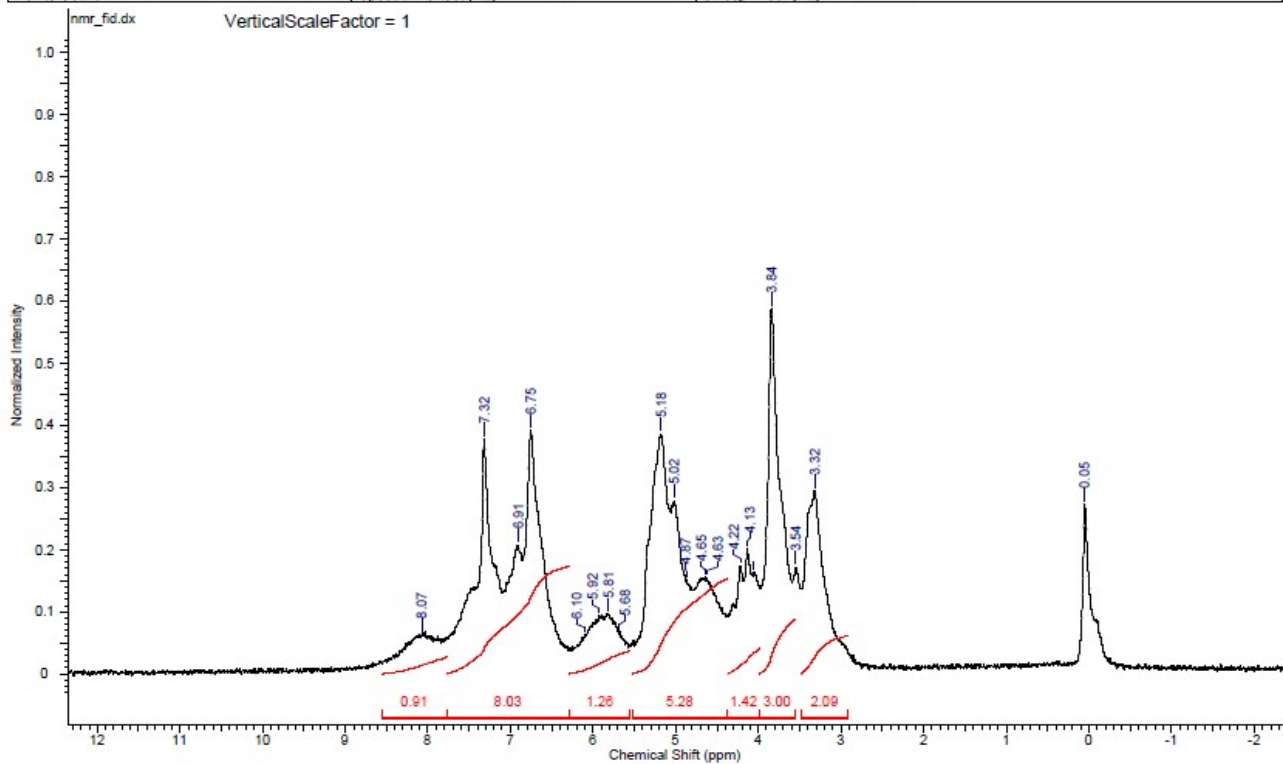

$^1\text{H}$  NMR spectrum of compound **14**

|                        |                                                                                                                           |                      |                                |                  |                         |
|------------------------|---------------------------------------------------------------------------------------------------------------------------|----------------------|--------------------------------|------------------|-------------------------|
| Acquisition Time (sec) | 6.5534                                                                                                                    | Comment              | 1D-1H-"PowerScan"              | Date             | 2022/03/08 12:28:52.526 |
| Date Stamp             | 2022/03/08 12:28:52.526                                                                                                   |                      |                                |                  |                         |
| File Name              | C:\Users\Hpi\Desktop\EU NMR Azizah\DrAzizah NMR\EUTriazole and EUOX-S-Alkyl\122851-1D PROTON-EUT-3_CDCI3_AZIZA\nmr_fid.dx |                      |                                |                  |                         |
| Frequency (MHz)        | 80.32                                                                                                                     | Nucleus              | 1H                             | Origin           | SPA3310 at Magritek     |
| Original Points Count  | 32768                                                                                                                     | Owner                | Copyright (C) 2022 by Magritek |                  |                         |
| Points Count           | 65536                                                                                                                     | Spectrum Offset (Hz) | 381.1301                       | Sweep Width (Hz) | 5000.15                 |

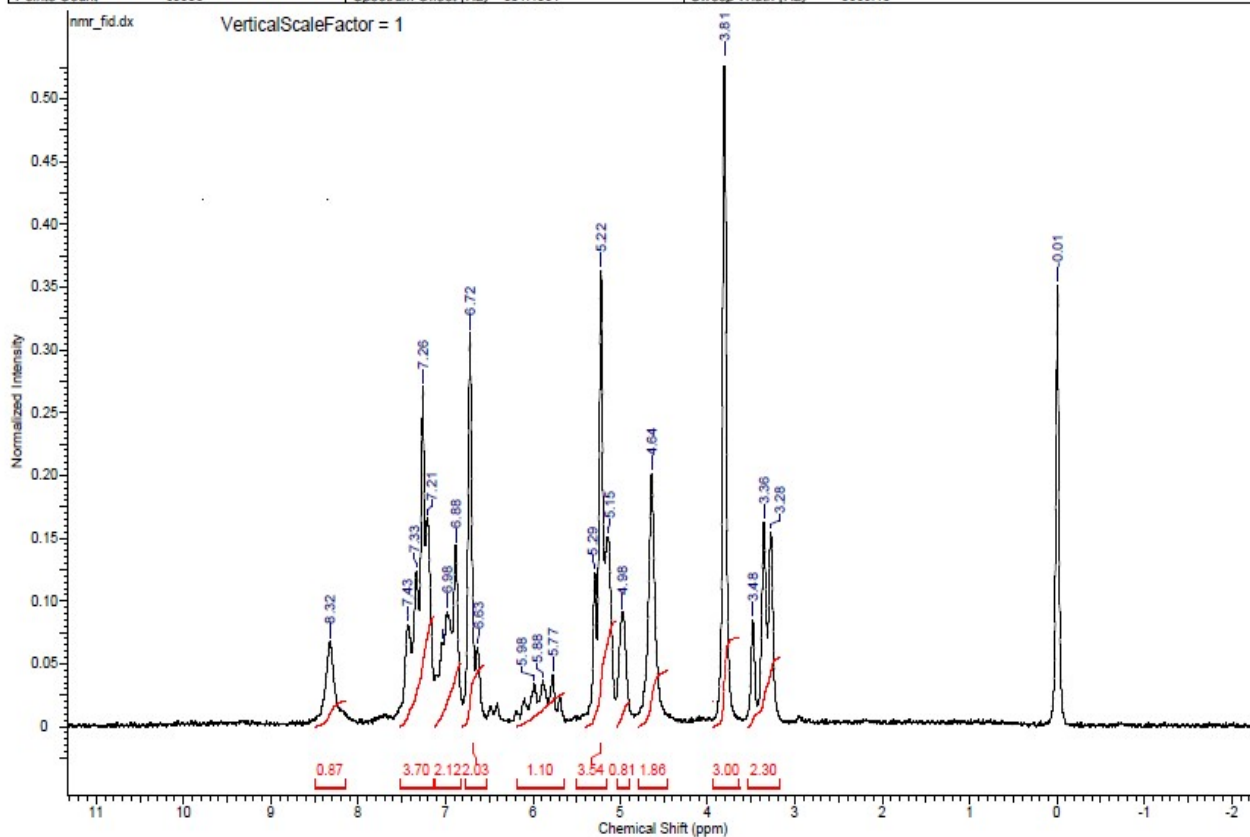

<sup>1</sup>H NMR spectrum of compound **15**

|                        |                                                                                                                           |                      |                                |                  |                         |
|------------------------|---------------------------------------------------------------------------------------------------------------------------|----------------------|--------------------------------|------------------|-------------------------|
| Acquisition Time (sec) | 6.5534                                                                                                                    | Comment              | 1D-1H-"PowerScan"              | Date             | 2022/03/08 11:51:08.186 |
| Date Stamp             | 2022/03/08 11:51:08.186                                                                                                   |                      |                                |                  |                         |
| File Name              | C:\Users\Hp\Desktop\EU NMR Azizah\DrAzizah NMR\EU-Triazole and EUOX-S-Alkyl\115107-1D PROTON-EUT-1 CDCI3 AZIZA\nmr_fid.dx |                      |                                |                  |                         |
| Frequency (MHz)        | 80.32                                                                                                                     | Nucleus              | 1H                             | Origin           | SPA3310 at Magritek     |
| Original Points Count  | 32768                                                                                                                     | Owner                | Copyright (C) 2022 by Magritek |                  |                         |
| Points Count           | 65536                                                                                                                     | Spectrum Offset (Hz) | 381.1301                       | Sweep Width (Hz) | 5000.15                 |

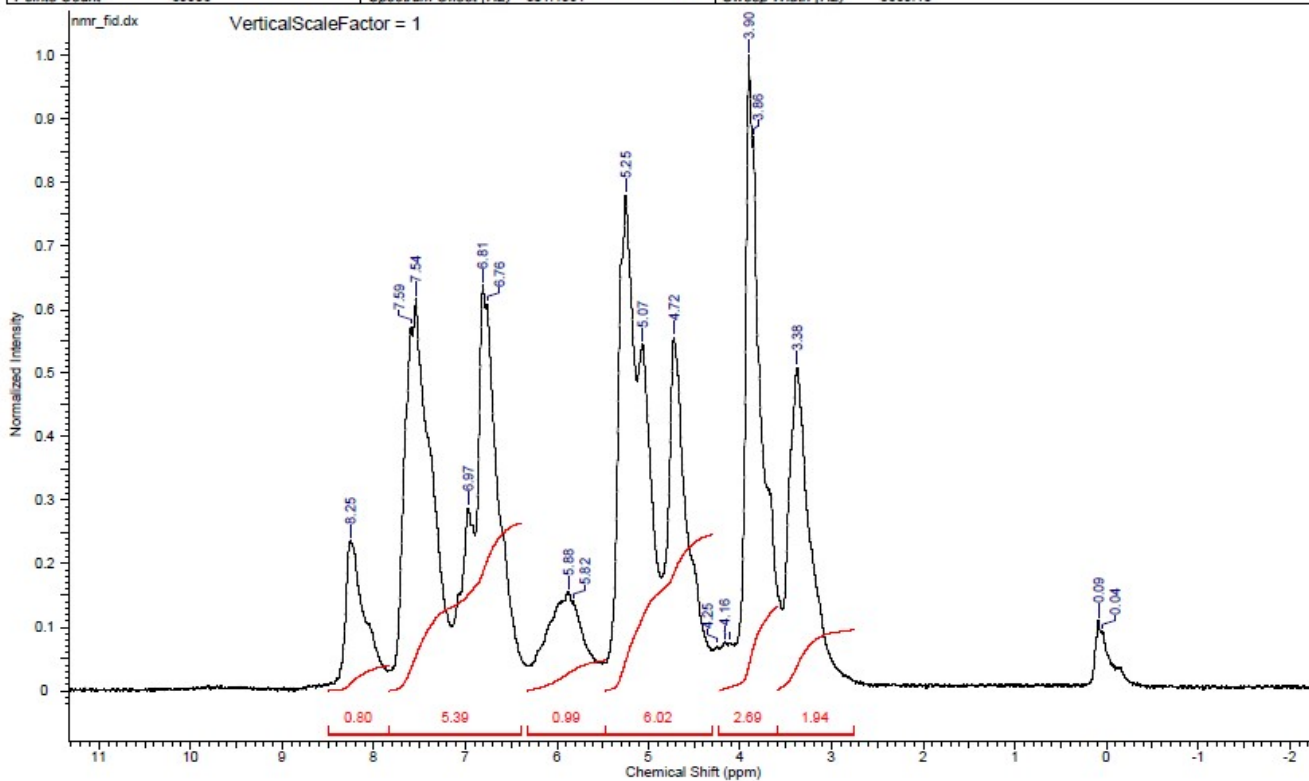

<sup>1</sup>H NMR spectrum of compound **16**

|                        |                                                                                                                          |                      |                                |                  |                         |
|------------------------|--------------------------------------------------------------------------------------------------------------------------|----------------------|--------------------------------|------------------|-------------------------|
| Acquisition Time (sec) | 6.5534                                                                                                                   | Comment              | 1D-1H-"PowerScan"              | Date             | 2022/03/08 09:28:40.050 |
| Date Stamp             | 2022/03/08 09:28:40.050                                                                                                  |                      |                                |                  |                         |
| File Name              | C:\Users\Hp\Desktop\EU NMR Azizah\DrAzizah NMR\EU\Triazole and EUOX-S-Alky\092839-1D PROTON-EUS-1 CDCB3_AZIZA\nmr_fid.dx |                      |                                |                  |                         |
| Frequency (MHz)        | 80.32                                                                                                                    | Nucleus              | 1H                             | Origin           | SPA3310 at Magritek     |
| Original Points Count  | 32768                                                                                                                    | Owner                | Copyright (C) 2022 by Magritek |                  |                         |
| Points Count           | 65536                                                                                                                    | Spectrum Offset (Hz) | 380.6982                       | Sweep Width (Hz) | 5000.15                 |

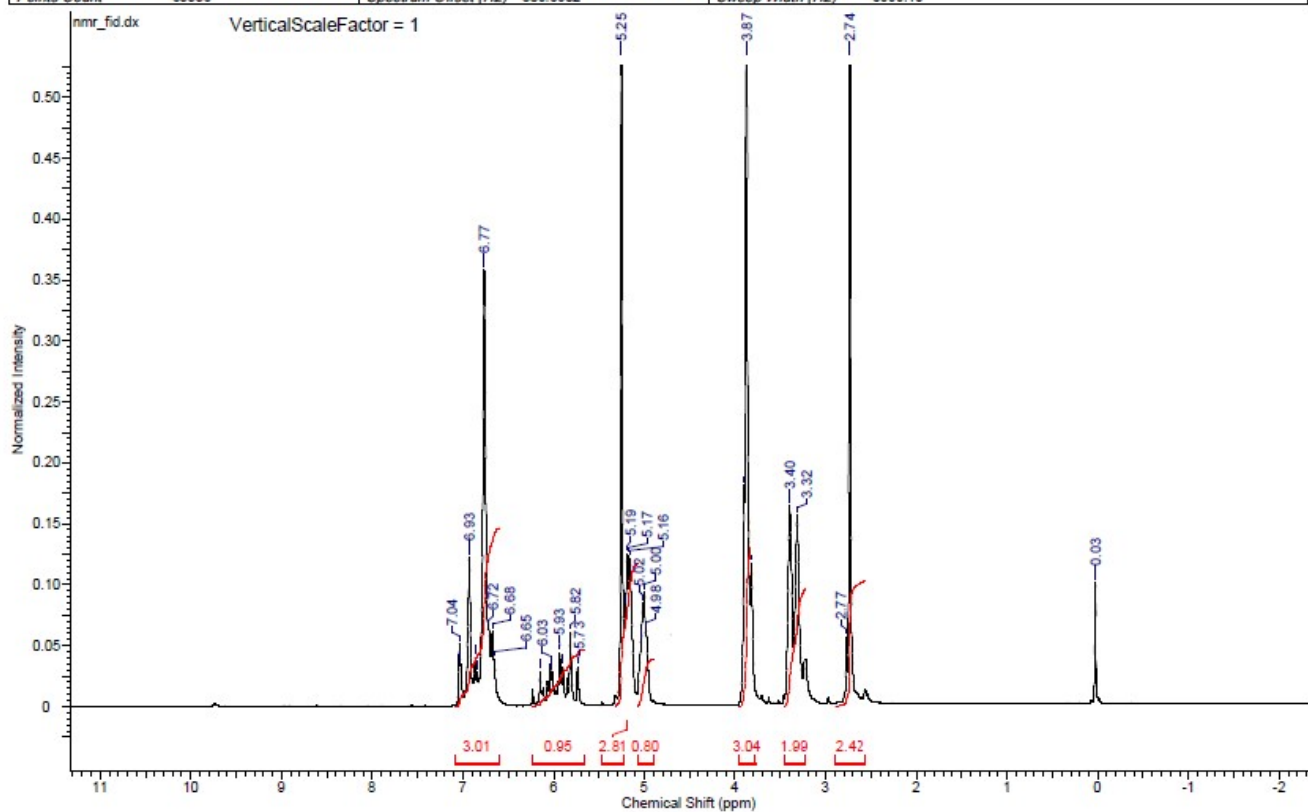

<sup>1</sup>H NMR spectrum of compound **17**

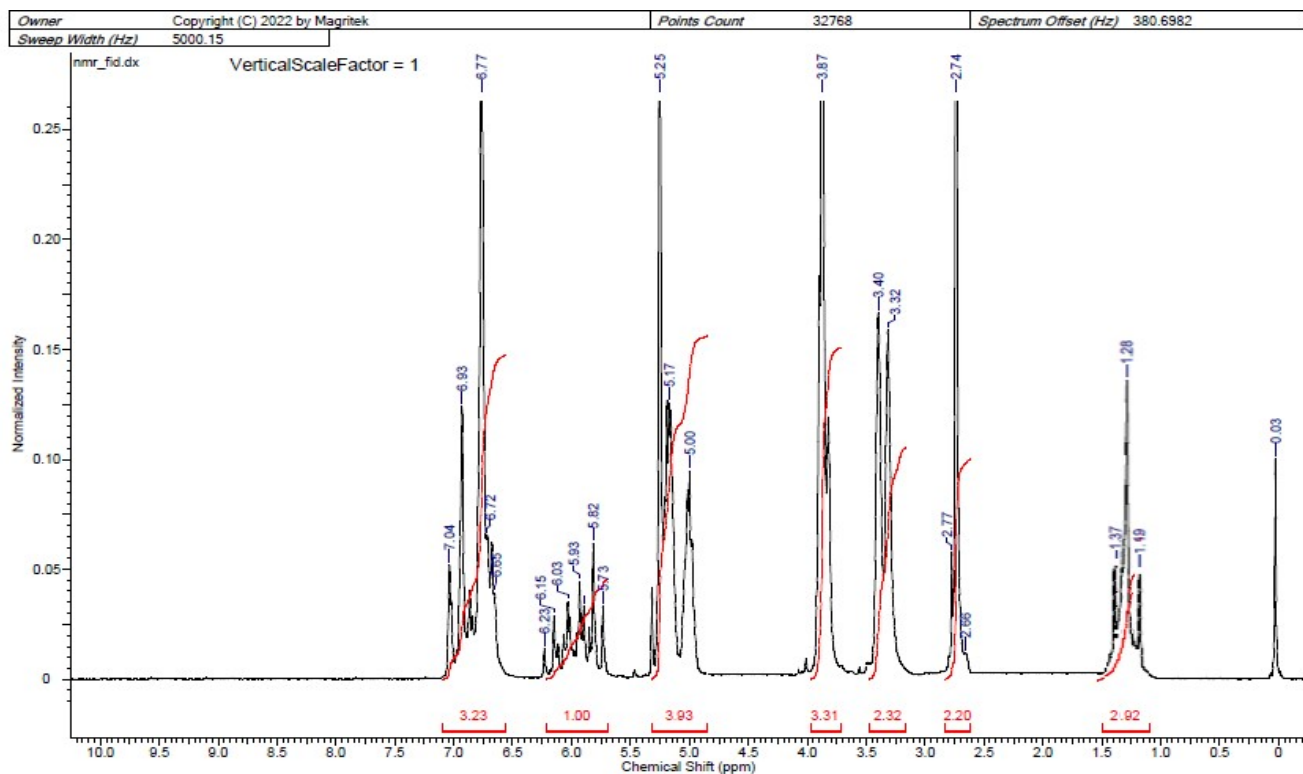

<sup>1</sup>H NMR spectrum of compound **18**

|                        |                                                                                                                           |                      |                                |                  |                         |
|------------------------|---------------------------------------------------------------------------------------------------------------------------|----------------------|--------------------------------|------------------|-------------------------|
| Acquisition Time (sec) | 6.5534                                                                                                                    | Comment              | 1D-1H-"PowerScan"              | Date             | 2022/03/08 10:05:43.398 |
| Date Stamp             | 2022/03/08 10:05:43.398                                                                                                   |                      |                                |                  |                         |
| File Name              | C:\Users\Hp\Desktop\1EU NMR Azizah\DrAzizah NMR\EUTriazole and EUOX-S-Alkyl\100542-1D PROTON-EUS-2 CDCI3 AZIZA\nmr_fid.dx |                      |                                |                  |                         |
| Frequency (MHz)        | 80.32                                                                                                                     | Nucleus              | 1H                             | Origin           | SPA3310 at Magritek     |
| Original Points Count  | 32768                                                                                                                     | Owner                | Copyright (C) 2022 by Magritek |                  |                         |
| Points Count           | 131072                                                                                                                    | Spectrum Offset (Hz) | 380.6982                       | Sweep Width (Hz) | 5000.15                 |

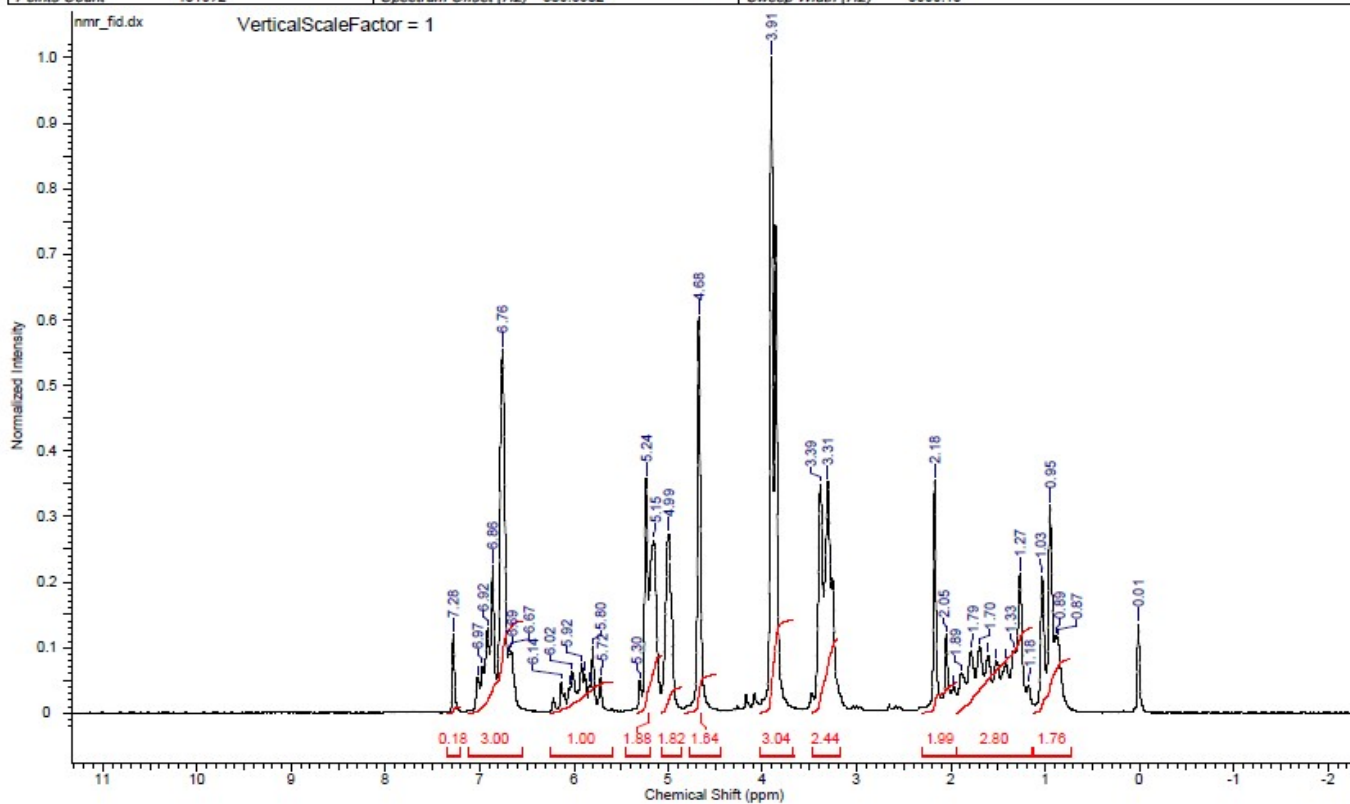

<sup>1</sup>H NMR spectrum of compound **19**

## <sup>13</sup>C NMR spectra of compounds 6-19

|                        |                                                                                        |                      |                                |                  |                         |
|------------------------|----------------------------------------------------------------------------------------|----------------------|--------------------------------|------------------|-------------------------|
| Acquisition Time (sec) | 1.2286                                                                                 | Comment              | 1D-13C-16384-3                 | Date             | 2022/04/19 14:31:08.666 |
| Date Stamp             | 2022/04/19 14:31:08.666                                                                |                      |                                |                  |                         |
| File Name              | M:\NEU NMR Azizah\EUA and EUT\EUT_carbon\143108-1D CARBON WALTZ-EUT-8 CDCL3\nmr_fid.dx |                      |                                |                  |                         |
| Frequency (MHz)        | 20.20                                                                                  | Nucleus              | 13C                            | Origin           | SPA3310 at Magritek     |
| Original Points Count  | 8192                                                                                   | Owner                | Copyright (C) 2022 by Magritek |                  |                         |
| Points Count           | 8192                                                                                   | Spectrum Offset (Hz) | 2222.3068                      | Sweep Width (Hz) | 6667.49                 |

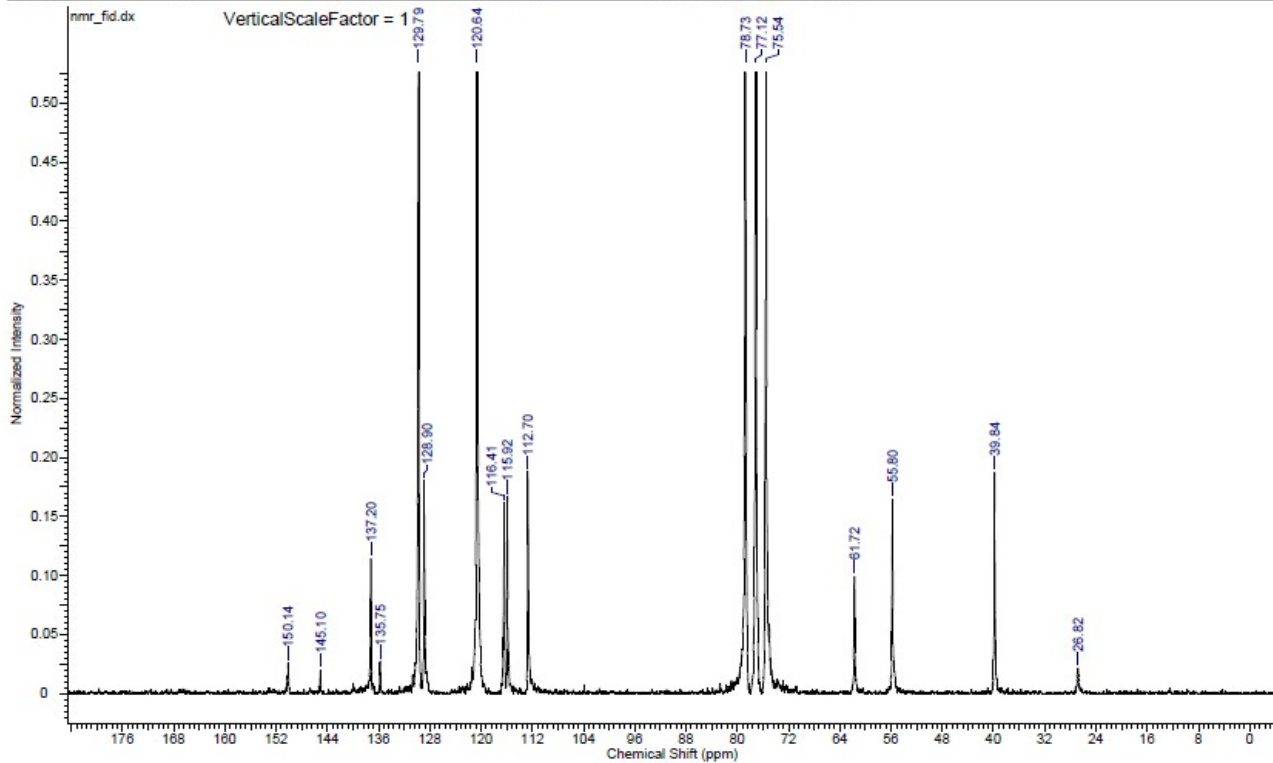

<sup>13</sup>C NMR spectrum of compound 6

|                        |                         |                      |                                                                                              |                  |                         |
|------------------------|-------------------------|----------------------|----------------------------------------------------------------------------------------------|------------------|-------------------------|
| Acquisition Time (sec) | 1.2286                  | Comment              | 1D-13C-32768-3                                                                               | Date             | 2022/05/29 15:32:38.492 |
| Date Stamp             | 2022/05/29 15:32:38.492 | File Name            | M:\EUT NMR Azizah\EUA and EUT\EUT carbon\EUT2-C_153238-1D CARBON WALTZ-EUT2 CDCL3\nmr_fid.dx |                  |                         |
| Frequency (MHz)        | 20.20                   | Nucleus              | 13C                                                                                          | Origin           | SPA3310 at Magritek     |
| Original Points Count  | 8192                    | Owner                | Copyright (C) 2022 by Magritek                                                               |                  |                         |
| Points Count           | 32768                   | Spectrum Offset (Hz) | 2222.3120                                                                                    | Sweep Width (Hz) | 6667.49                 |

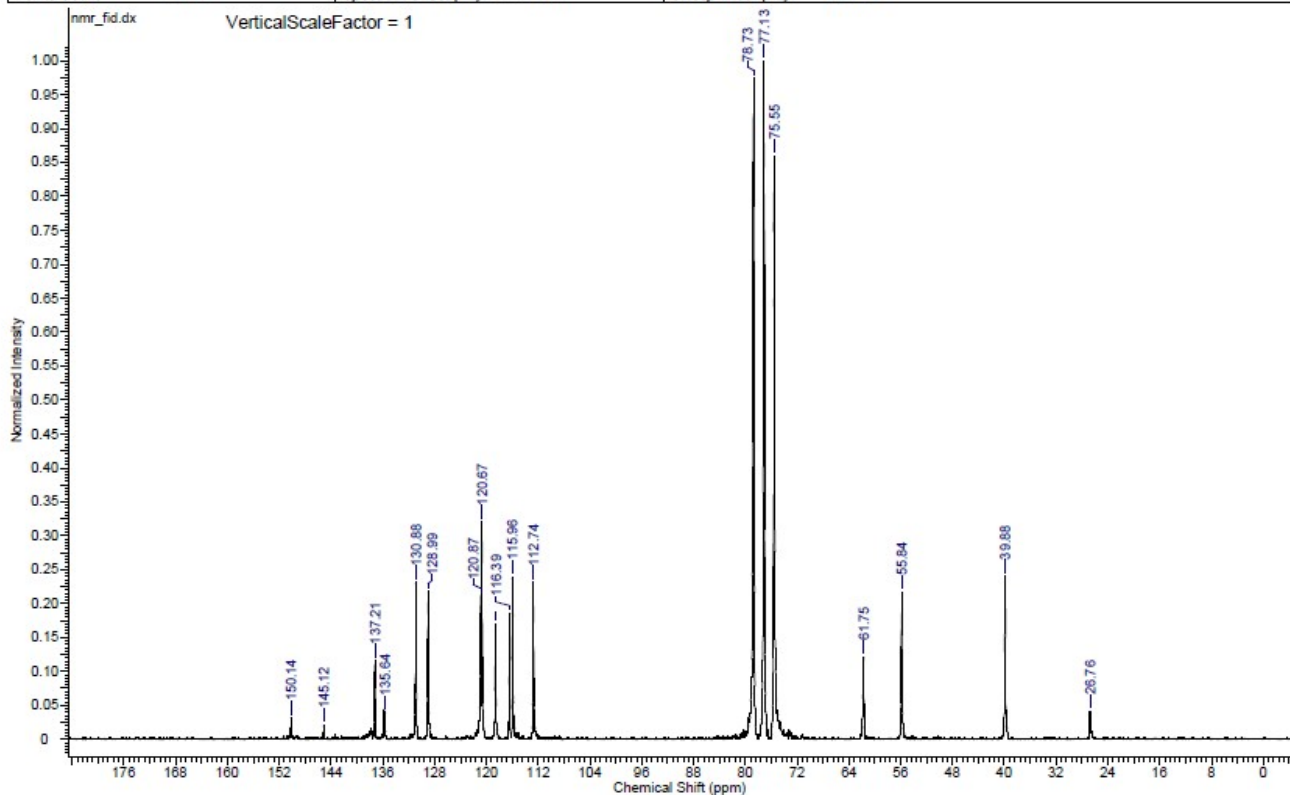

<sup>13</sup>C NMR spectrum of compound 7



|                        |                         |                      |                                                                                                  |                  |                         |
|------------------------|-------------------------|----------------------|--------------------------------------------------------------------------------------------------|------------------|-------------------------|
| Acquisition Time (sec) | 1.2286                  | Comment              | 1D-13C-16384-3                                                                                   | Date             | 2022/05/24 15:10:04.172 |
| Date Stamp             | 2022/05/24 15:10:04.172 | File Name            | M:\EUT NMR Azizah\EUA and EUTE\EUT carbon\EUT11-C_151003-1D CARBON WALTZ-EUT11 AZIZAH\nmr_fid.dx |                  |                         |
| Frequency (MHz)        | 20.20                   | Nucleus              | 13C                                                                                              | Origin           | SPA3310 at Magritek     |
| Original Points Count  | 8192                    | Owner                | Copyright (C) 2022 by Magritek                                                                   |                  |                         |
| Points Count           | 16384                   | Spectrum Offset (Hz) | 2222.3130                                                                                        | Sweep Width (Hz) | 6667.49                 |

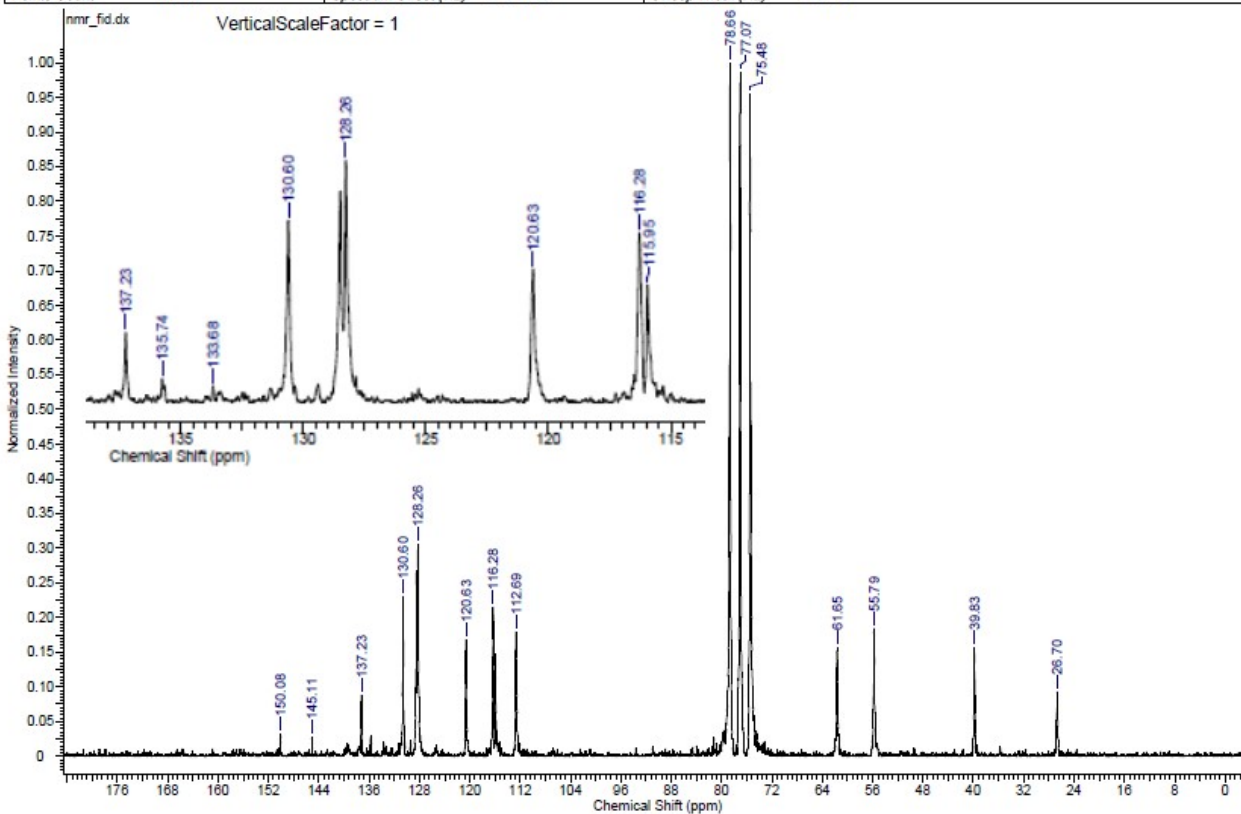

<sup>13</sup>C NMR spectrum of compound **8**

|                        |                         |                      |                                                                                               |                  |                         |
|------------------------|-------------------------|----------------------|-----------------------------------------------------------------------------------------------|------------------|-------------------------|
| Acquisition Time (sec) | 1.2286                  | Comment              | 1D-13C-16384-3                                                                                | Date             | 2022/04/07 14:16:17.133 |
| Date Stamp             | 2022/04/07 14:16:17.133 | File Name            | M:\EUT NMR Azizah\EUA and EUT\EUT carbon\141616-1D CARBON WALTZ-EUT-9 azizah CDCI3\nmr_fid.dx |                  |                         |
| Frequency (MHz)        | 20.20                   | Nucleus              | 13C                                                                                           | Origin           | SPA3310 at Magritek     |
| Original Points Count  | 8192                    | Owner                | Copyright (C) 2022 by Magritek                                                                |                  |                         |
| Points Count           | 32768                   | Spectrum Offset (Hz) | 2222.3040                                                                                     | Sweep Width (Hz) | 6667.48                 |

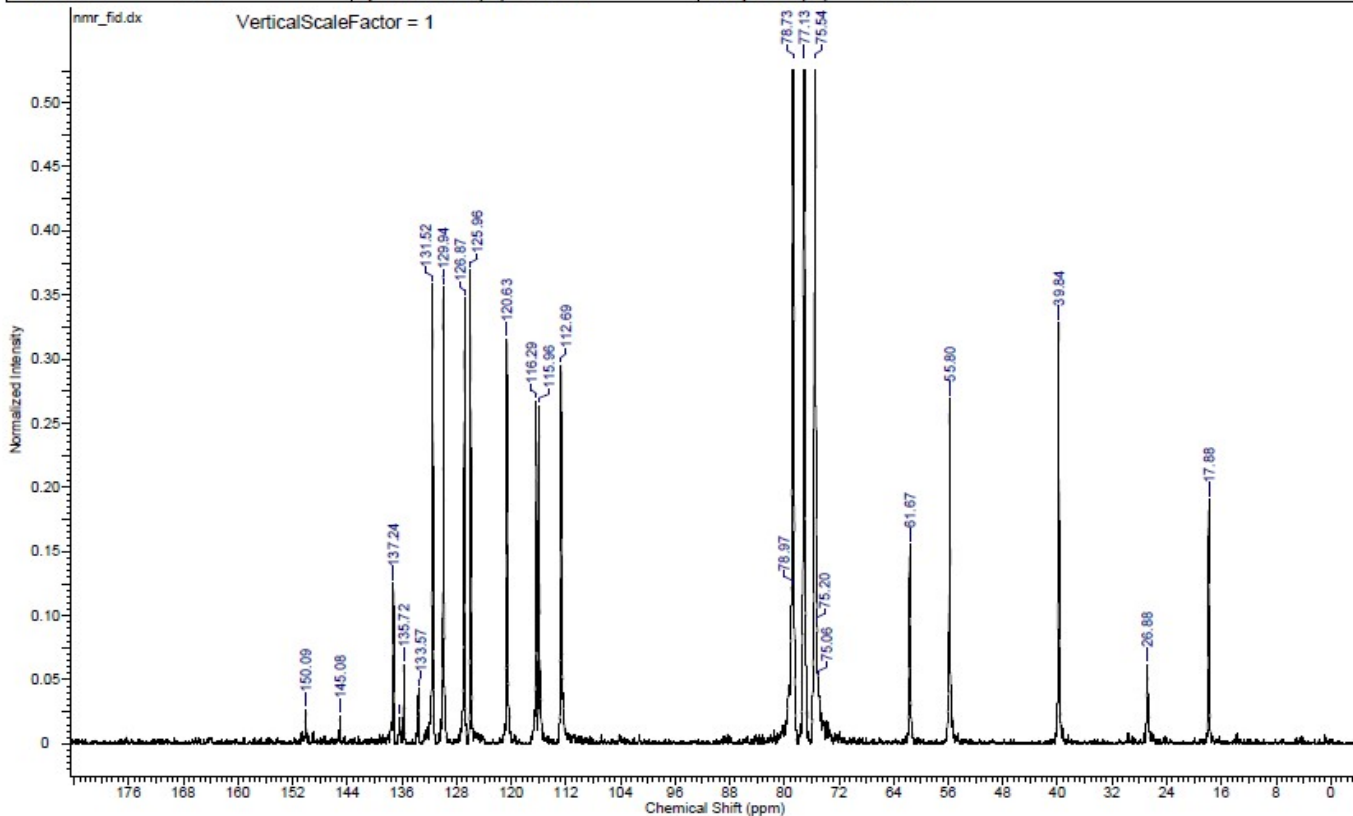

<sup>13</sup>C NMR spectrum of compound 9

|                        |                         |                      |                                                                                               |                  |                         |
|------------------------|-------------------------|----------------------|-----------------------------------------------------------------------------------------------|------------------|-------------------------|
| Acquisition Time (sec) | 1.2286                  | Comment              | 1D-13C-16384-3                                                                                | Date             | 2022/05/18 14:48:14.872 |
| Date Stamp             | 2022/05/18 14:48:14.872 | File Name            | M:\EUT NMR Azizah\EUA and EUT\EUT carbon\144814-1D CARBON WALTZ-EUT-10 CDCL3 AZIZA\nmr_fid.dx |                  |                         |
| Frequency (MHz)        | 20.20                   | Nucleus              | 13C                                                                                           | Origin           | SPA3310 at Magritek     |
| Original Points Count  | 8192                    | Owner                | Copyright (C) 2022 by Magritek                                                                |                  |                         |
| Points Count           | 32768                   | Spectrum Offset (Hz) | 2222.3120                                                                                     | Sweep Width (Hz) | 6667.49                 |

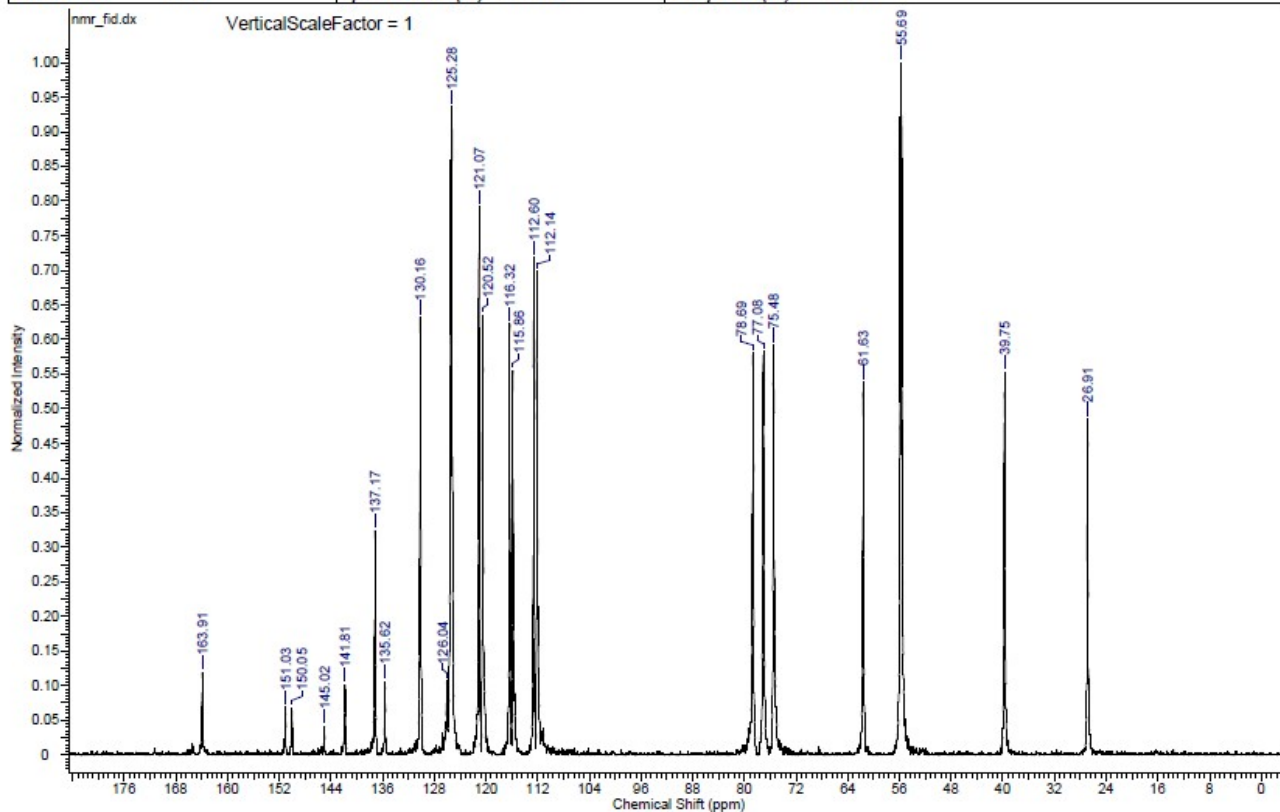

<sup>13</sup>C NMR spectrum of compound **10**

|                       |                                                                                      |                      |                                |
|-----------------------|--------------------------------------------------------------------------------------|----------------------|--------------------------------|
| File Name             | M:\EU NMR Azizah\EUA and EUTEUT carbon\144328-1D CARBON WALTZ-EUT-4 CDCl3\nmr_fid.dx |                      |                                |
| Frequency (MHz)       | 20.20                                                                                | Nucleus              | <sup>13</sup> C                |
| Original Points Count | 8192                                                                                 | Owner                | Copyright (C) 2022 by Magritek |
| Points Count          | 32768                                                                                | Spectrum Offset (Hz) | 2222.3030                      |
|                       |                                                                                      | Sweep Width (Hz)     | 6667.49                        |

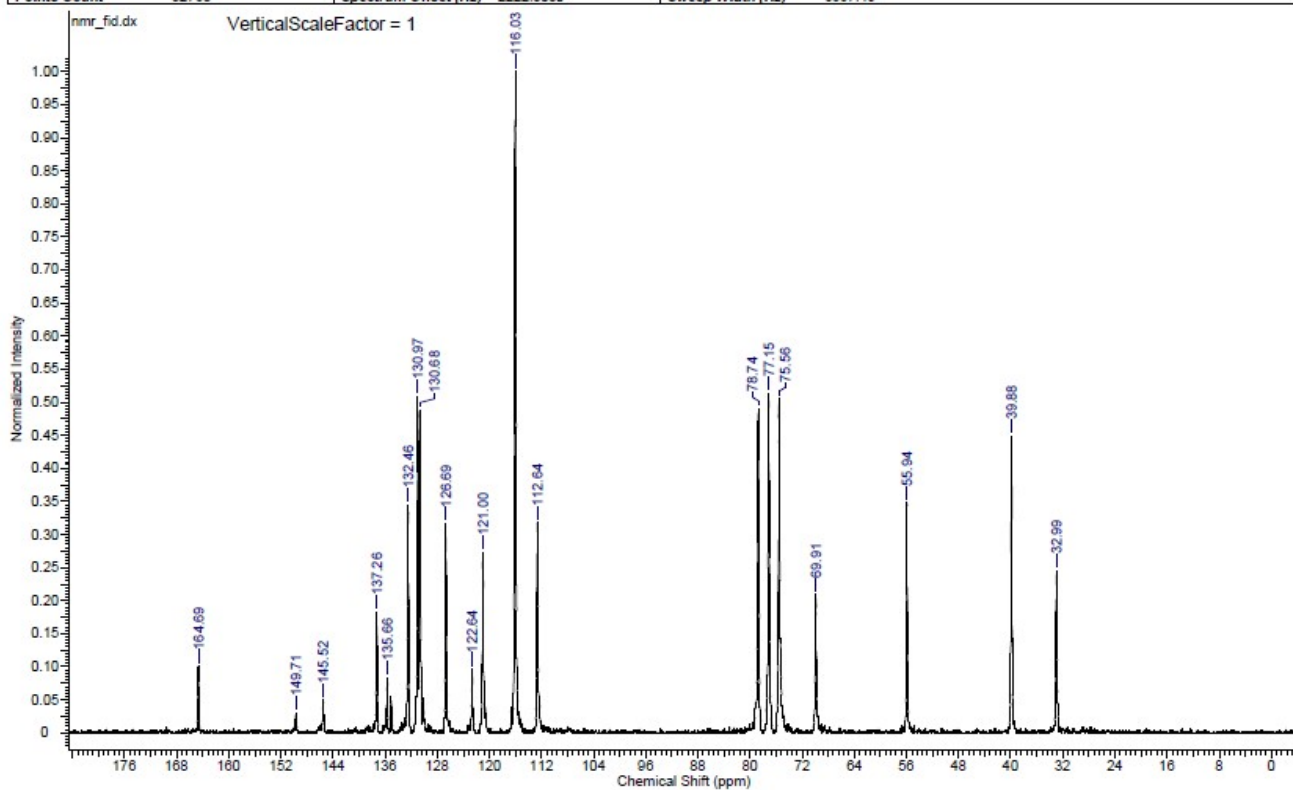

<sup>13</sup>C NMR spectrum of compound **11**

|                        |                         |                      |                                                                                                    |                  |                         |
|------------------------|-------------------------|----------------------|----------------------------------------------------------------------------------------------------|------------------|-------------------------|
| Acquisition Time (sec) | 1.2286                  | Comment              | 1D-13C-16384-3                                                                                     | Date             | 2022/05/25 14:14:05.616 |
| Date Stamp             | 2022/05/25 14:14:05.616 | File Name            | M:\EU NMR Azizah\EUA and EUT\EUT carbon\EUTS-C_141405-1D CARBON WALTZ-EUT-5_CDCl3_AZIZA\nmr_fid.dx |                  |                         |
| Frequency (MHz)        | 20.20                   | Nucleus              | 13C                                                                                                | Origin           | SPA3310 at Magritek     |
| Original Points Count  | 8192                    | Owner                | Copyright (C) 2022 by Magritek                                                                     |                  |                         |
| Points Count           | 32768                   | Spectrum Offset (Hz) | 2222.3140                                                                                          | Sweep Width (Hz) | 6667.49                 |

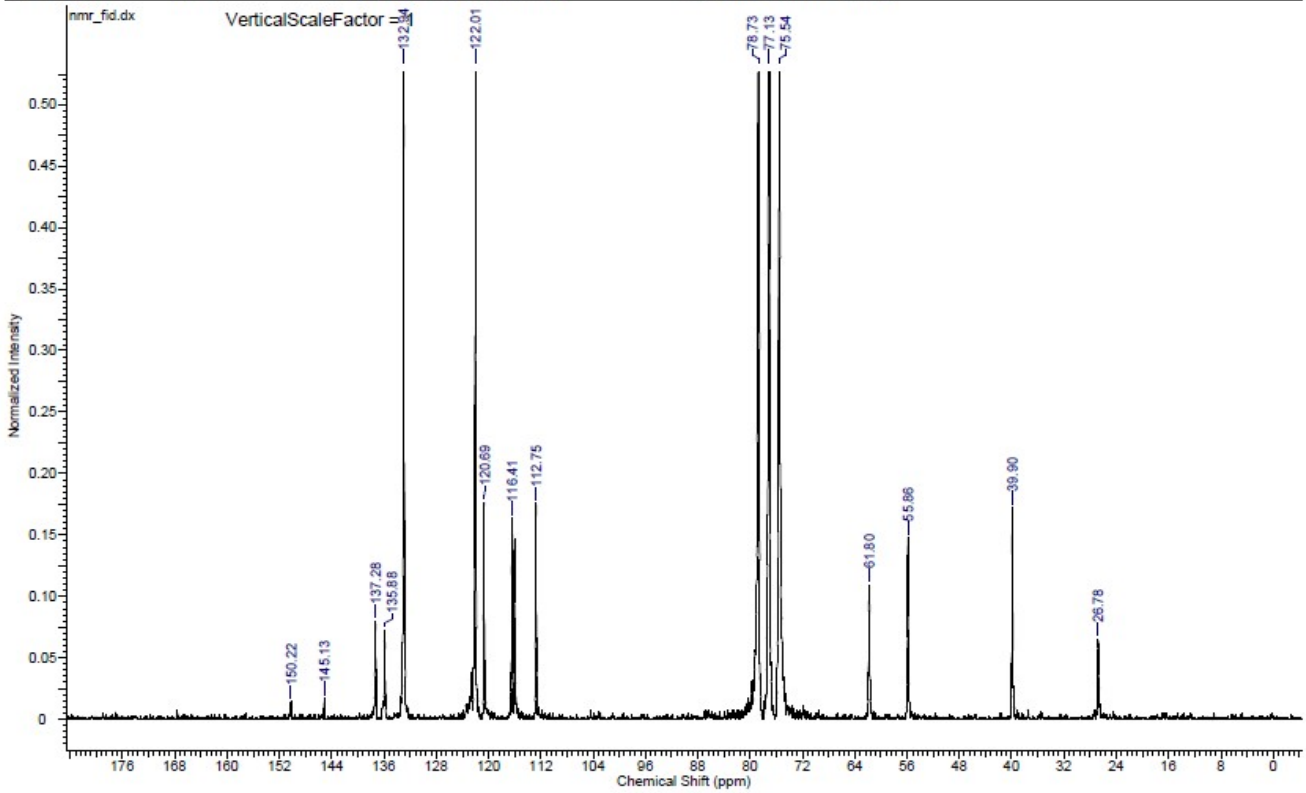

<sup>13</sup>C NMR spectrum of compound **12**

|                        |                         |                      |                                                                                               |                  |                         |
|------------------------|-------------------------|----------------------|-----------------------------------------------------------------------------------------------|------------------|-------------------------|
| Acquisition Time (sec) | 1.2286                  | Comment              | 1D-13C-16384-3                                                                                | Date             | 2022/05/12 14:24:43.148 |
| Date Stamp             | 2022/05/12 14:24:43.148 | File Name            | M\1E\NMR Azizah\1EUA and EUT\1EUT carbon\142442-1D CARBON WALTZ-EUT-6 AZIZAH CDCL3\nmr_fid.dx |                  |                         |
| Frequency (MHz)        | 20.20                   | Nucleus              | 13C                                                                                           | Origin           | SPA3310 at Magritek     |
| Original Points Count  | 8192                    | Owner                | Copyright (C) 2022 by Magritek                                                                |                  |                         |
| Points Count           | 32768                   | Spectrum Offset (Hz) | 2222.3169                                                                                     | Sweep Width (Hz) | 6667.49                 |

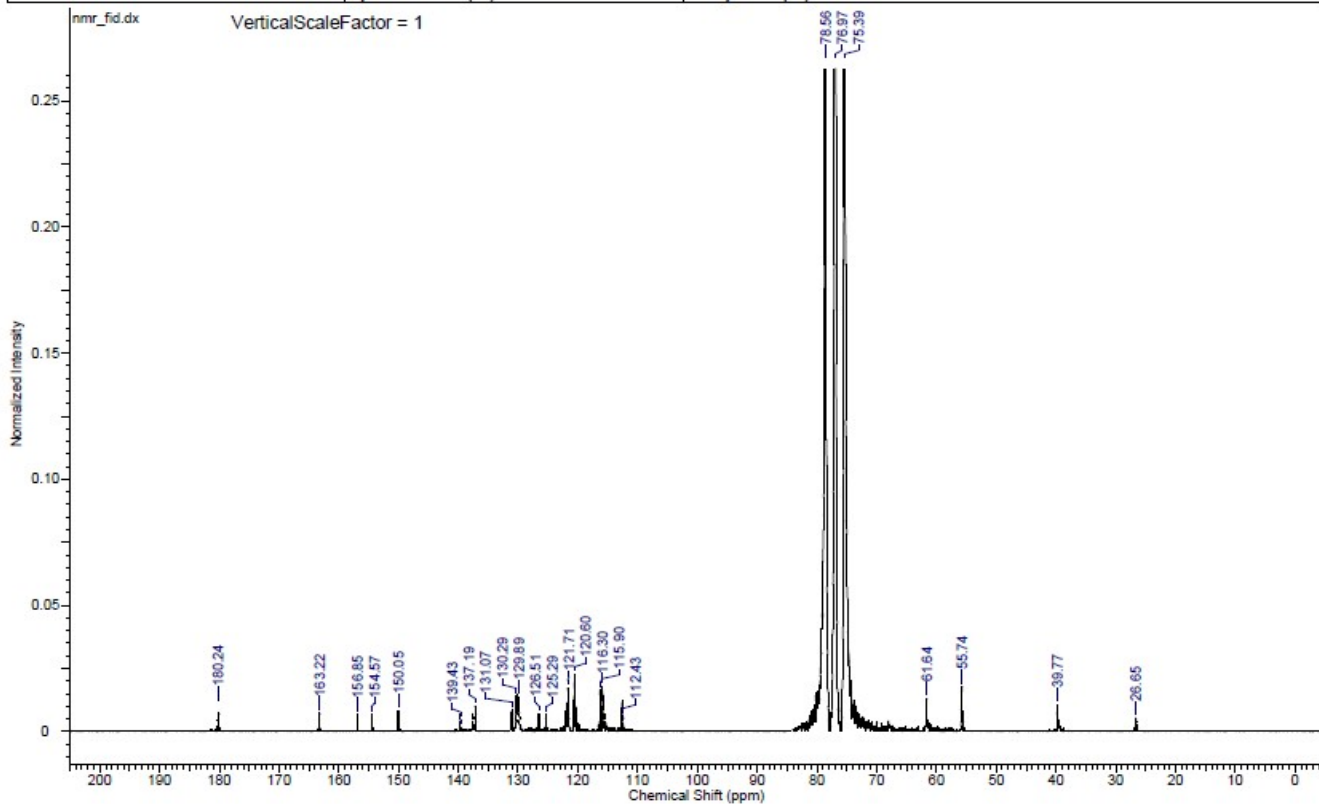

<sup>13</sup>C NMR spectrum of compound **13**

|                        |                                                                                              |                      |                                |                  |                         |
|------------------------|----------------------------------------------------------------------------------------------|----------------------|--------------------------------|------------------|-------------------------|
| Acquisition Time (sec) | 1.2286                                                                                       | Date                 | 2022/05/17 14:55:54.045        | Date Stamp       | 2022/05/17 14:55:54.045 |
| File Name              | M:\EU NMR Azizah\EUA and EUT\EUT carbon\145553-1D CARBON WALTZ-EUT-7 CDCL3 AZIZAH\nmr_fid.dx |                      |                                | fid.dx           |                         |
| Frequency (MHz)        | 20.20                                                                                        | Nucleus              | <sup>13</sup> C                | Origin           | SPA3310 at Magritek     |
| Original Points Count  | 8192                                                                                         | Owner                | Copyright (C) 2022 by Magritek |                  |                         |
| Points Count           | 32768                                                                                        | Spectrum Offset (Hz) | 2222.3120                      | Sweep Width (Hz) | 6667.49                 |

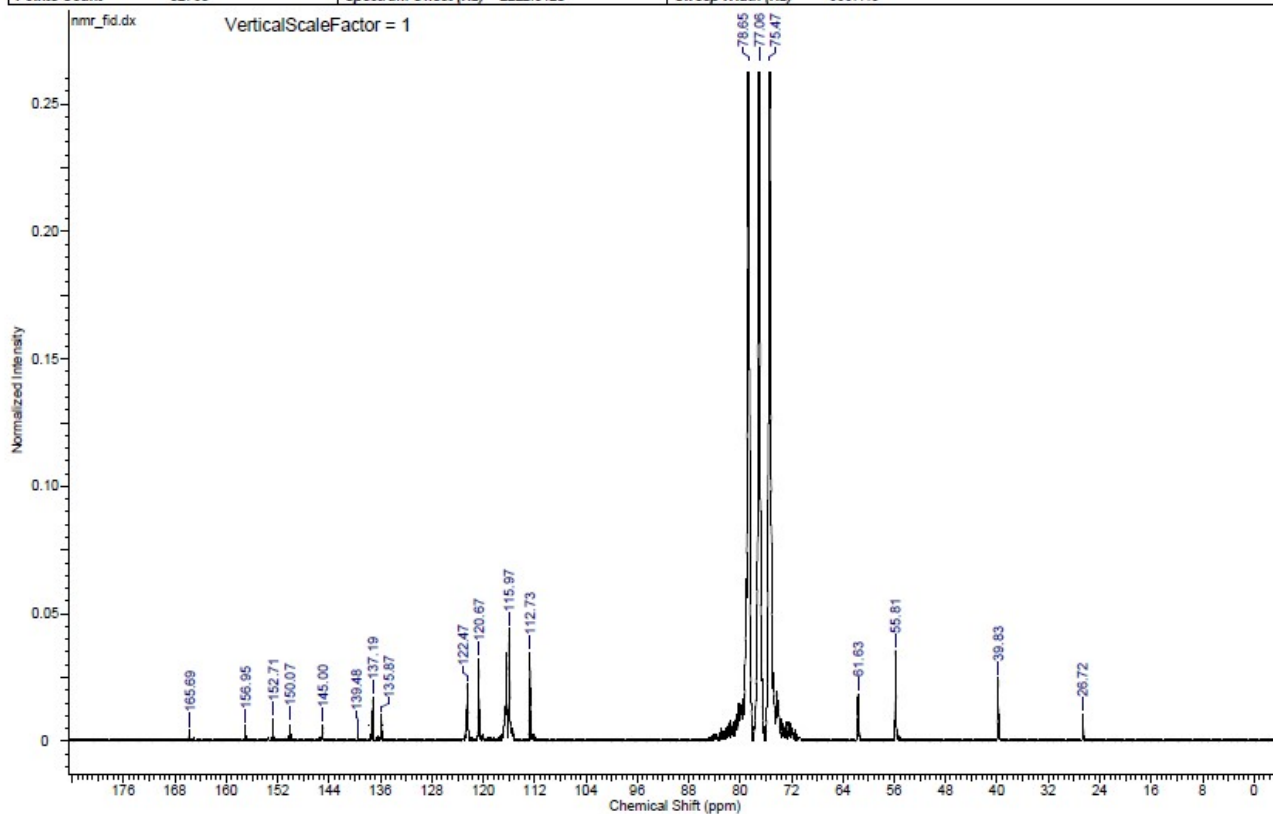

<sup>13</sup>C NMR spectrum of compound **14**

|                        |                         |                      |                                                                                              |                  |                         |
|------------------------|-------------------------|----------------------|----------------------------------------------------------------------------------------------|------------------|-------------------------|
| Acquisition Time (sec) | 1.2286                  | Comment              | 1D-13C-16384-3                                                                               | Date             | 2022/05/09 14:35:02.756 |
| Date Stamp             | 2022/05/09 14:35:02.756 | File Name            | M:\EU NMR Azizah\IUA and EUT\EUT carbon\143502-1D CARBON WALTZ-EUT-3 CDCL3_azizah\nmr_fid.dx |                  |                         |
| Frequency (MHz)        | 20.20                   | Nucleus              | 13C                                                                                          | Origin           | SPA3310 at Magritek     |
| Original Points Count  | 8192                    | Owner                | Copyright (C) 2022 by Magritek                                                               |                  |                         |
| Points Count           | 32768                   | Spectrum Offset (Hz) | 2222.3179                                                                                    | Sweep Width (Hz) | 6667.49                 |

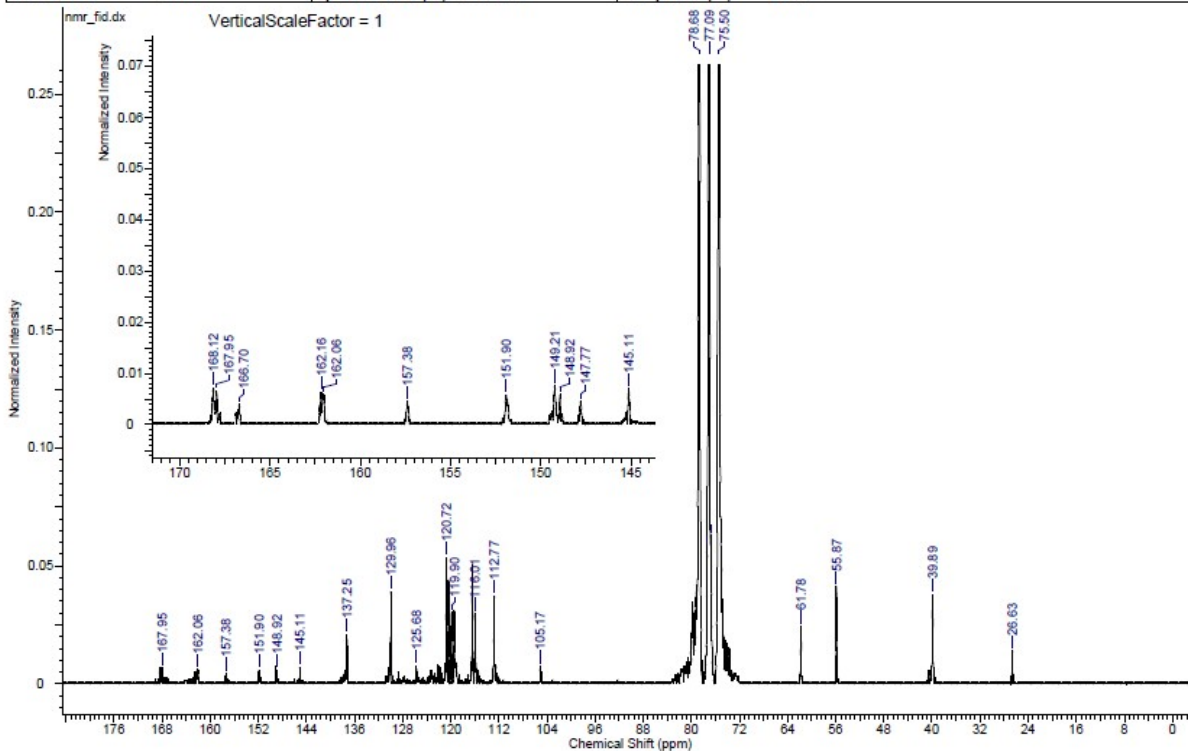

<sup>13</sup>C NMR spectrum of compound **15**



|                       |       |                      |                                |                  |                     |
|-----------------------|-------|----------------------|--------------------------------|------------------|---------------------|
| Frequency (MHz)       | 20.20 | Nucleus              | <sup>13</sup> C                | Origin           | SPASSTU at Magritek |
| Original Points Count | 4096  | Owner                | Copyright (C) 2022 by Magritek |                  |                     |
| Points Count          | 16384 | Spectrum Offset (Hz) | 2222.3040                      | Sweep Width (Hz) | 6667.49             |

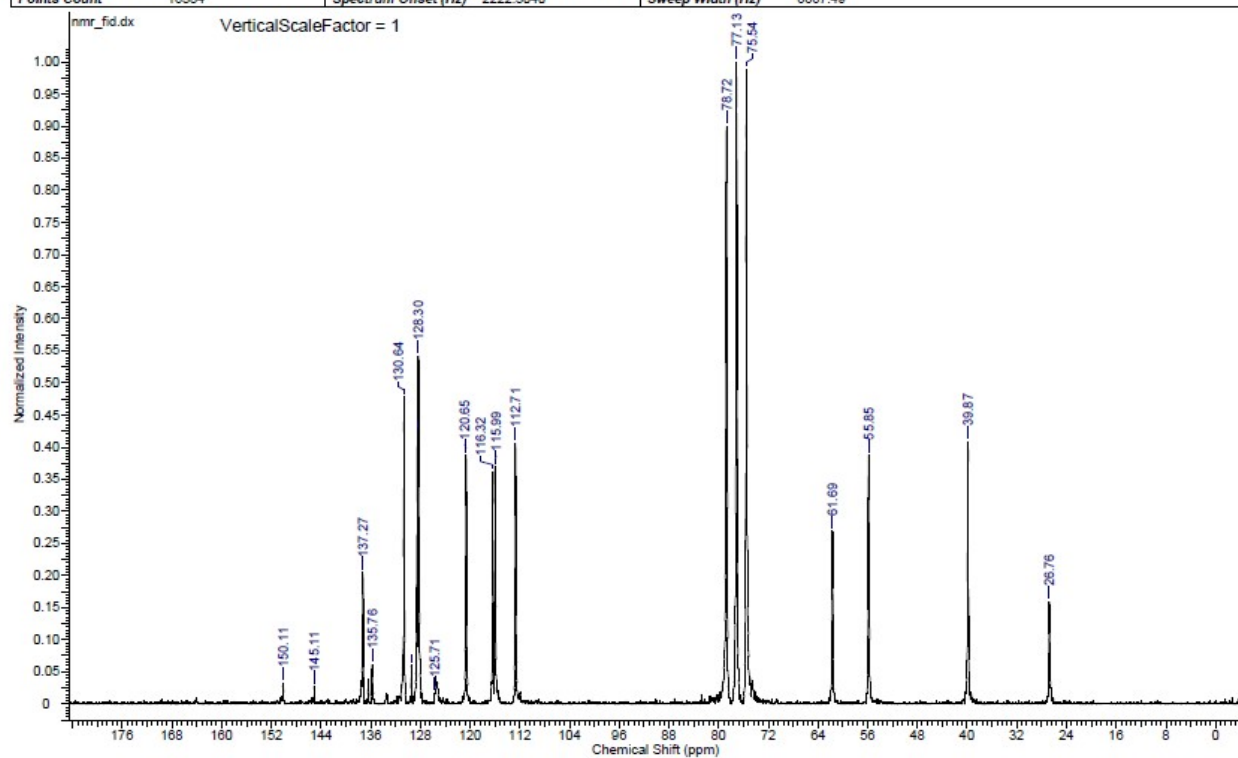

<sup>13</sup>C NMR spectrum of compound **16**

|                        |                                                                                       |                      |                                |                  |                         |
|------------------------|---------------------------------------------------------------------------------------|----------------------|--------------------------------|------------------|-------------------------|
| Acquisition Time (sec) | 1.2286                                                                                | Comment              | 1D-13C-16384-3                 | Date             | 2022/04/12 14:27:51.199 |
| Date Stamp             | 2022/04/12 14:27:51.199                                                               |                      |                                |                  |                         |
| File Name              | M:\EU NMR Azizah\EUA and EUT\EUT_carbon\142750-1D CARBON WALTZ-EUS-1 CDCl3\nmr_fid.dx |                      |                                |                  |                         |
| Frequency (MHz)        | 20.20                                                                                 | Nucleus              | 13C                            | Origin           | SPA3310 at Magritek     |
| Original Points Count  | 8192                                                                                  | Owner                | Copyright (C) 2022 by Magritek |                  |                         |
| Points Count           | 32768                                                                                 | Spectrum Offset (Hz) | 2222.3030                      | Sweep Width (Hz) | 6667.49                 |

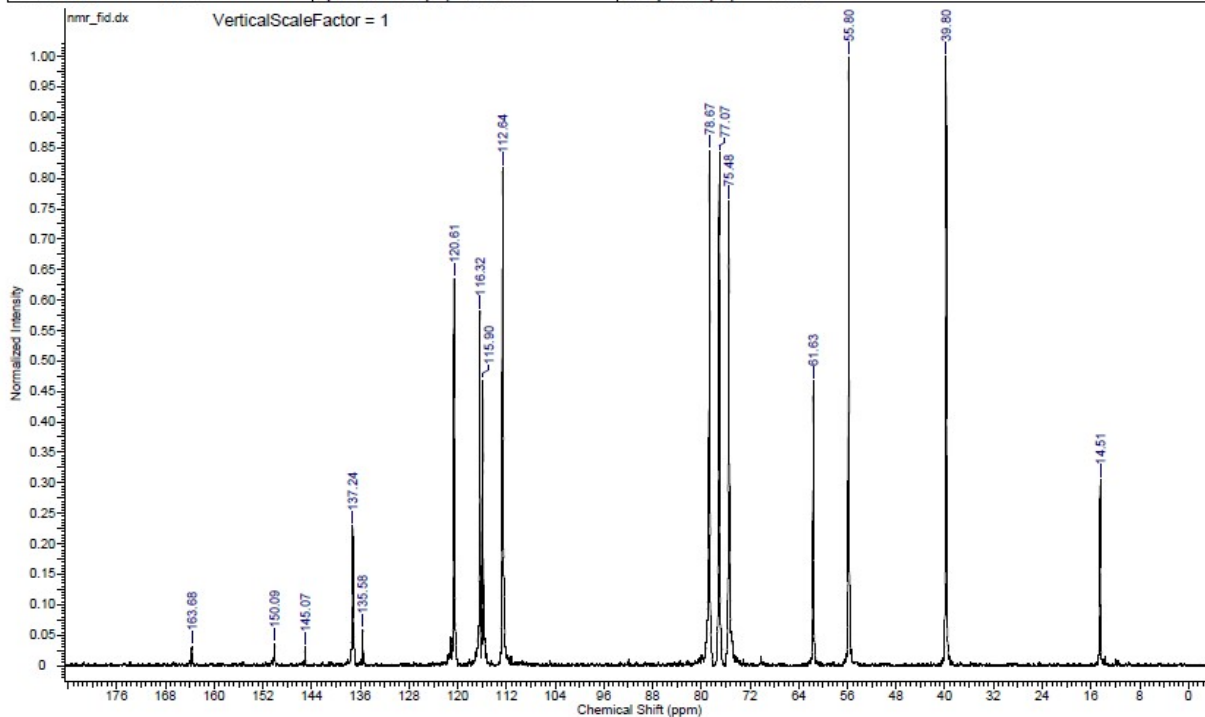

<sup>13</sup>C NMR spectrum of compound **17**

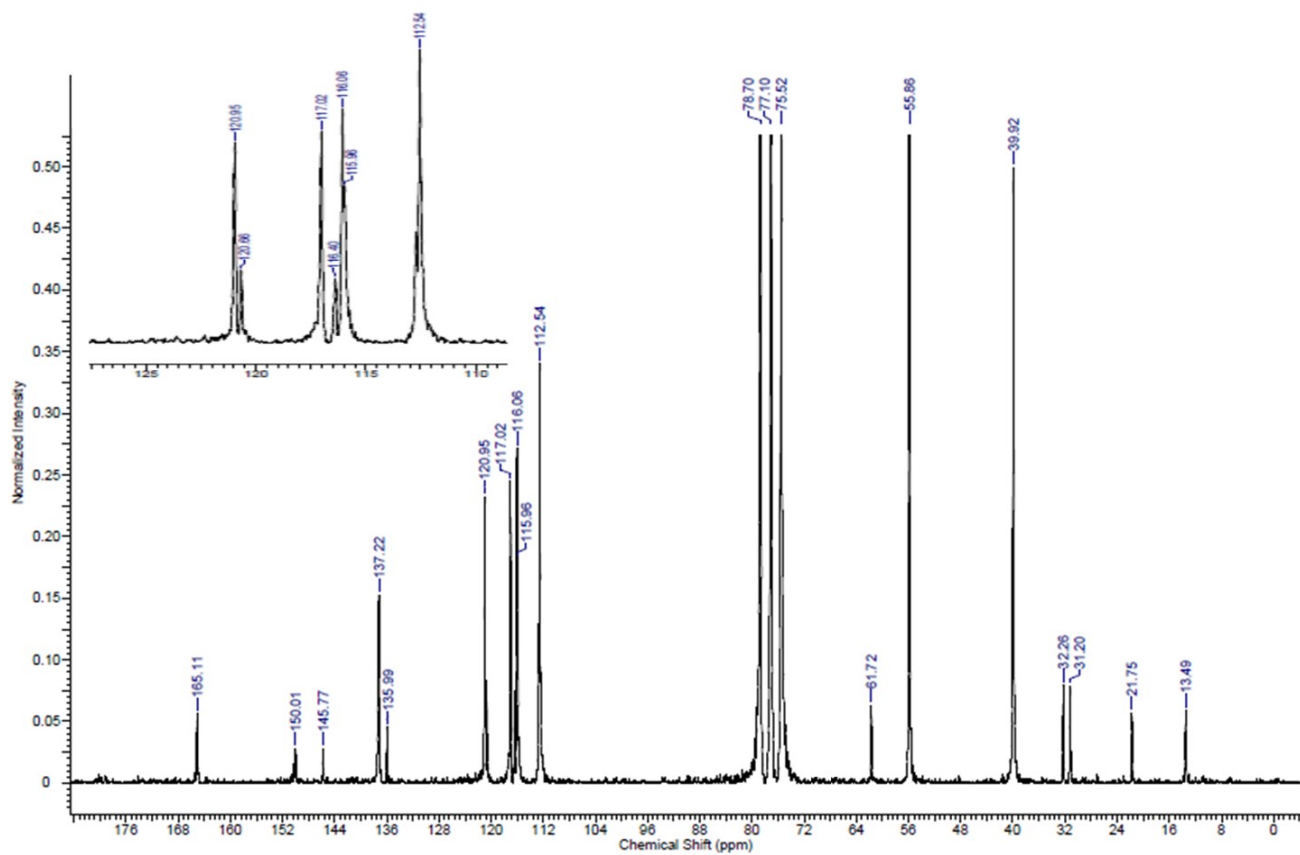

$^{13}\text{C}$  NMR spectrum of compound 19

## Mass spectra of compounds 6-19

D:\Dr Mahboob\...Eu-Ox-Tri-Ph  
LCF10605

9/20/2021 5:23:29 PM

Eu-ox-tri-ph

Eu-Ox-Tri-Ph #1 RT: 0.00 AV: 1 NL: 1.39E3  
T: ITMS + p ESI Full ms [150.00-600.00]

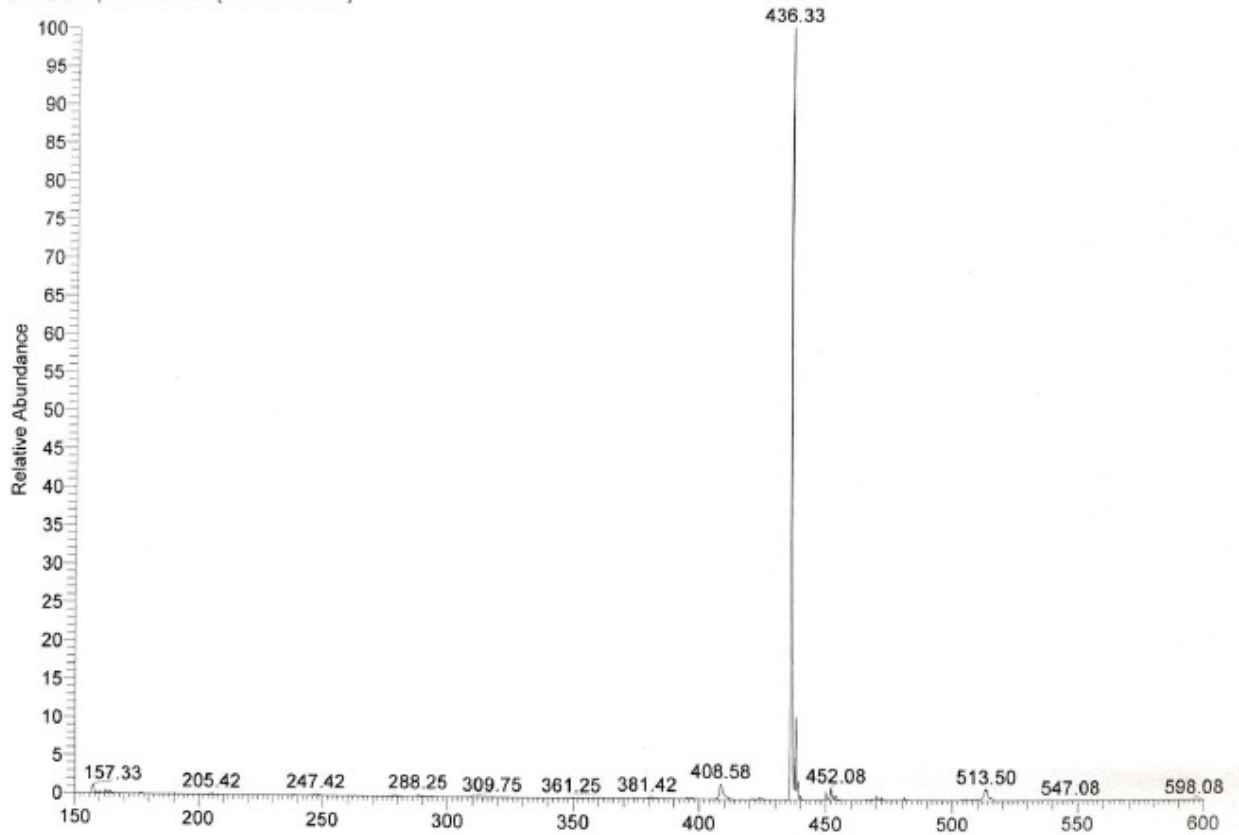

Compound 6

Eu-Ox-Tri-2-Cl#1 RT: 0.00 AV: 1 NL: 4.92E2  
T: ITMS + p ESI Full ms [150.00-600.00]

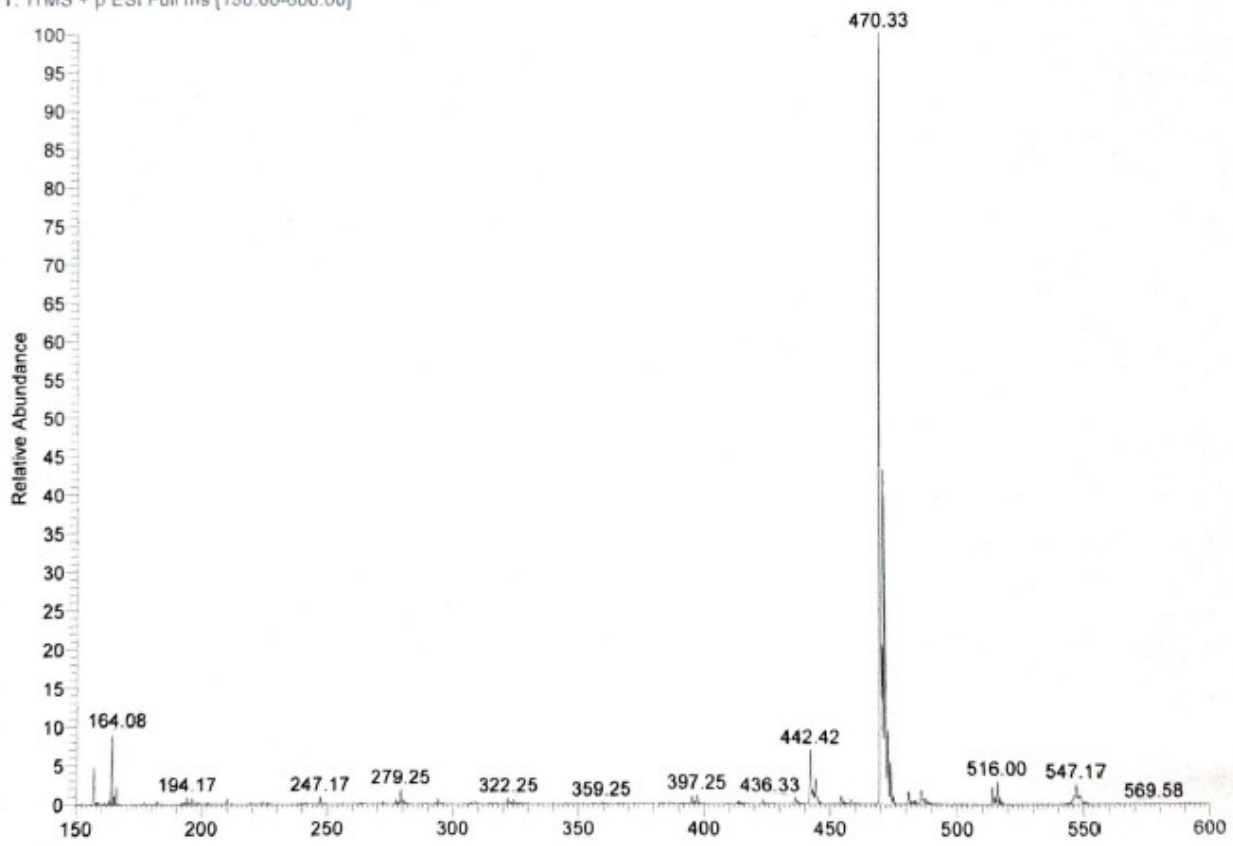

Compound 7

EU-OX-Tri-3-Cl #1 RT: 0.00 AV: 1 NL: 6.39E2  
T: ITMS + p ESI Full ms (150.00-600.00)

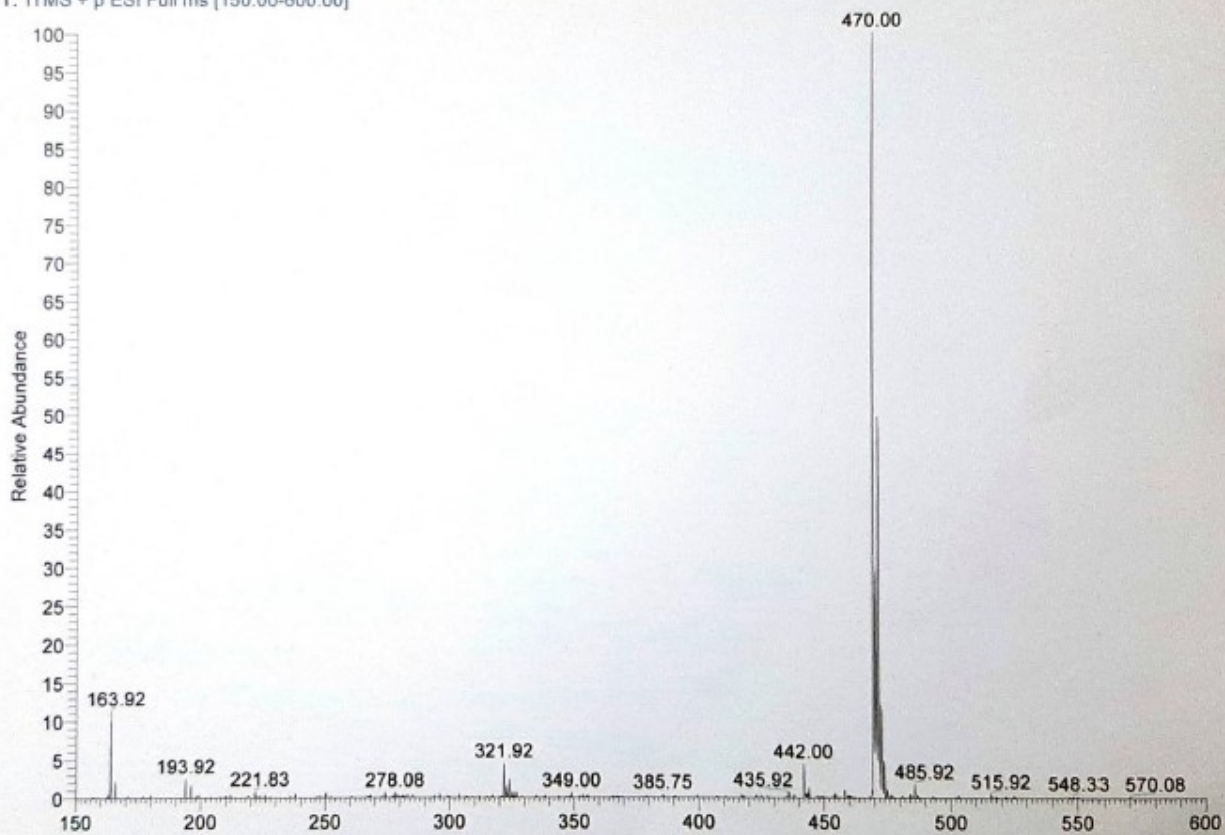

Compound 8

Eu-Ox-tri-2-Me #1 RT: 0.00 AV: 1 NL: 1.06E2  
T: ITMS + p ESI Full ms [150.00-600.00]

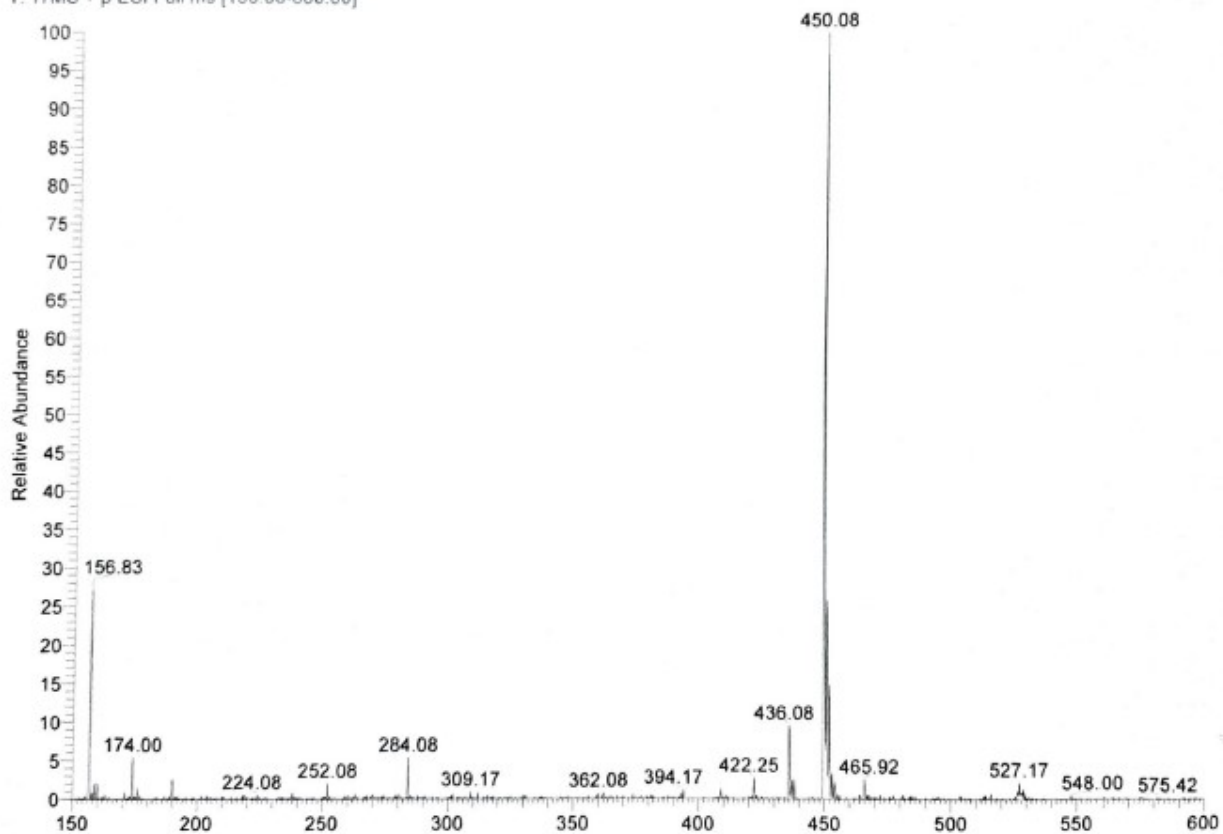

Compound 9

D:\Dr. Mahboob\...-OX-Tri-2-Ome LCP10623 12/9/2021 11:15:44 AM Eu-OX-Triazole-2-O-Me 464  
Eu-OX-Tri-2-Ome #1 RT: 0.00 AV: 1 NL: 2.67E3  
T: ITMS + p ESI Full ms [150.00-600.00]

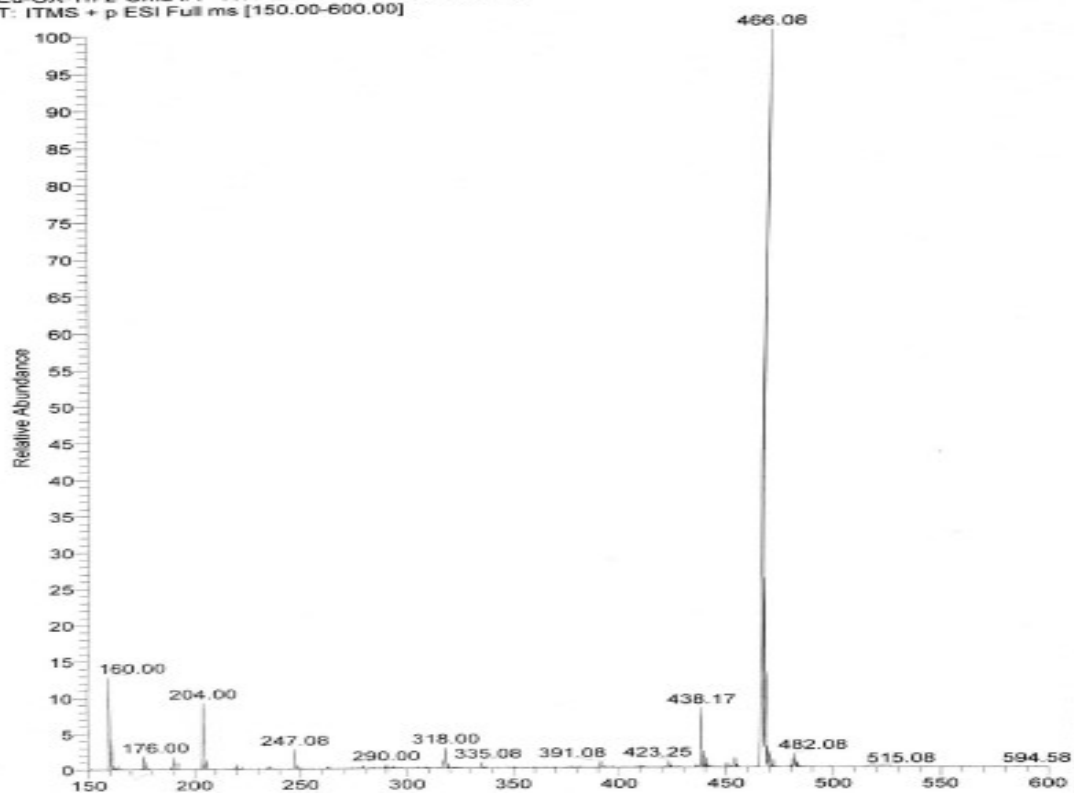

Compound 10



Eu-Ox-Tri-3Br 350 #1 RT: 0.00 AV: 1 NL: 1.16E2  
T: ITMS + p ESI Full ms [150.00-600.00]

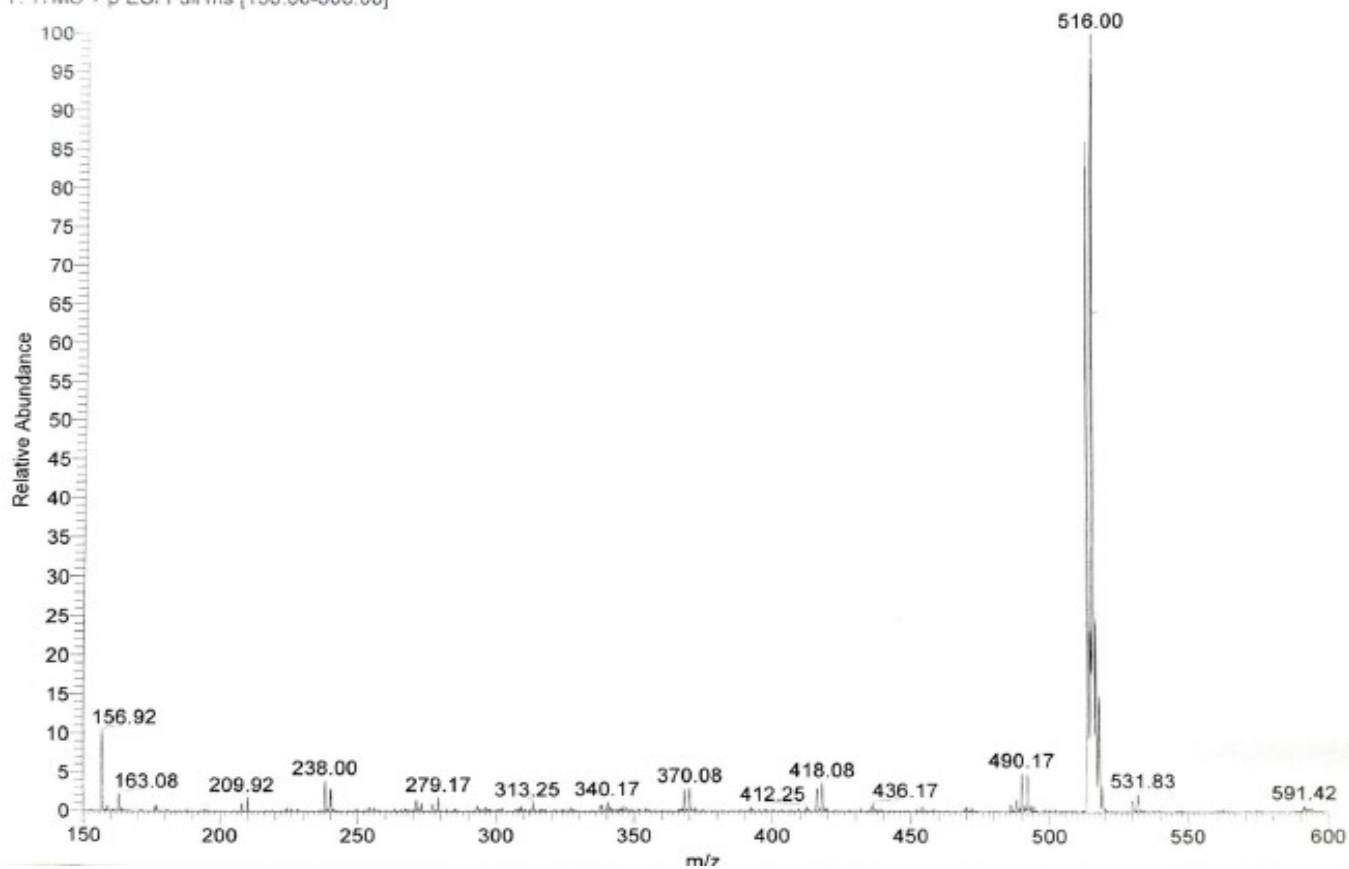

Compound 11

D:\Dr Mahboob\ 1Eu-OX-Tri-4-Br  
LCF10605

9/20/2021 5:00:42 PM

Eu-ox-tri-4-Br

Eu-OX-Tri-4-Br #1 RT: 0.00 AV: 1 NL: 6.11E2  
T: ITMS + p ESI Full ms [150.00-600.00]

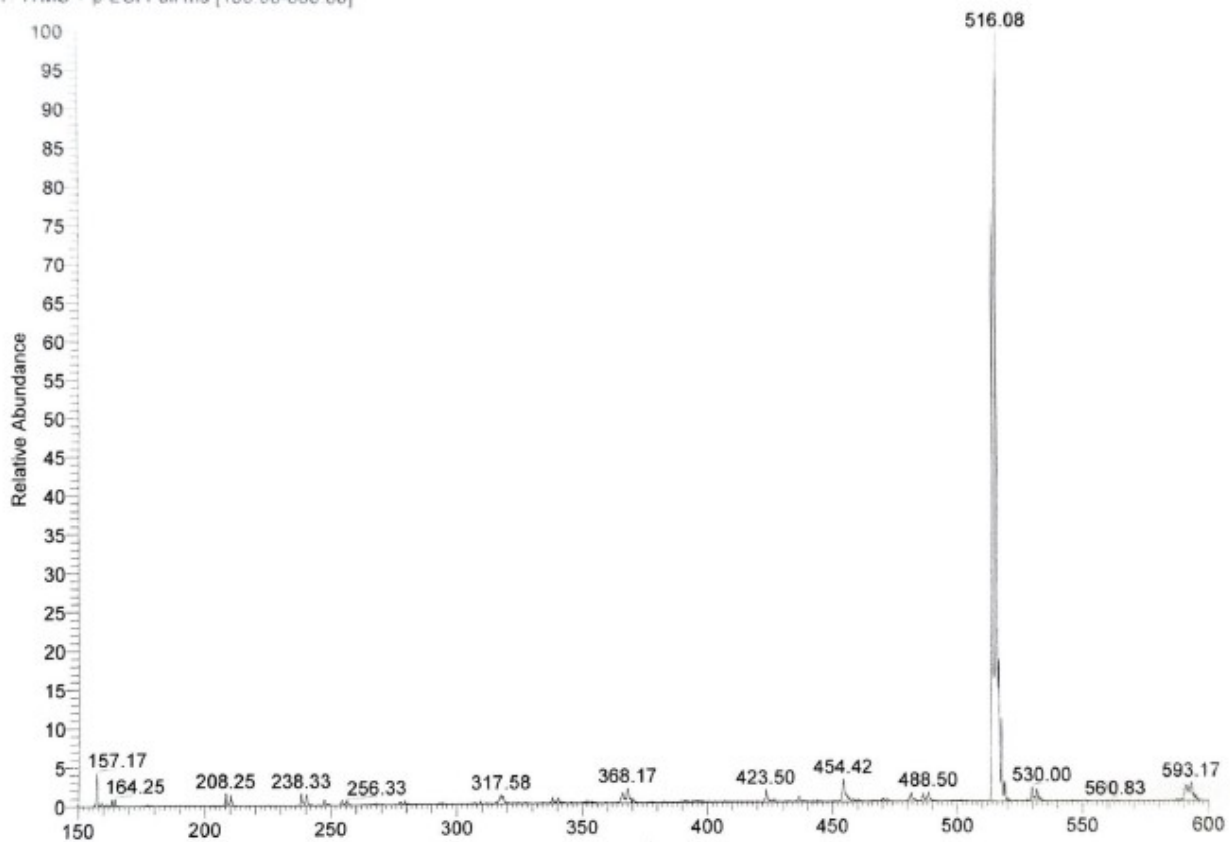

Compound 12

D:\Dr Mahboob\1Eu-OX-3-COOH  
LCF10805

9/20/2021 5:38:35 PM

Eu-ox-tri-Ph-3-COOH

Eu-OX-3-COOH #1 RT: 0.00 AV: 1 NL: 7.99E2

T: ITMS - p ESI Full ms [150.00-600.00]

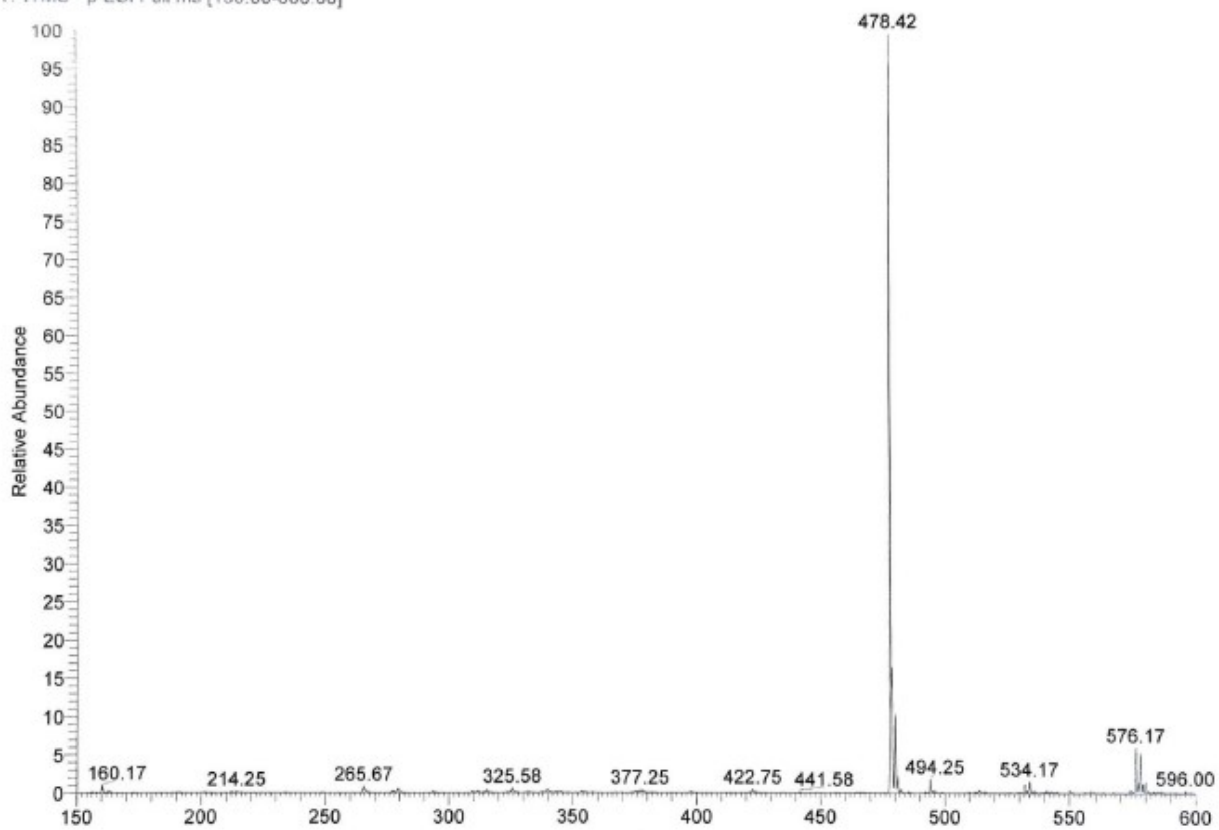

Compound 13

D:\Dr Mahboob\ Eu-OX-Tri-4-OH  
LCF10605

12/9/2021 11:38:51 AM

Eu-OX-Triazole-4-OH

Eu-OX-Tri-4-OH #1 RT: 0.00 AV: 1 NL: 3.78E1  
T: ITMS + p ESI Full ms [150.00-600.00]

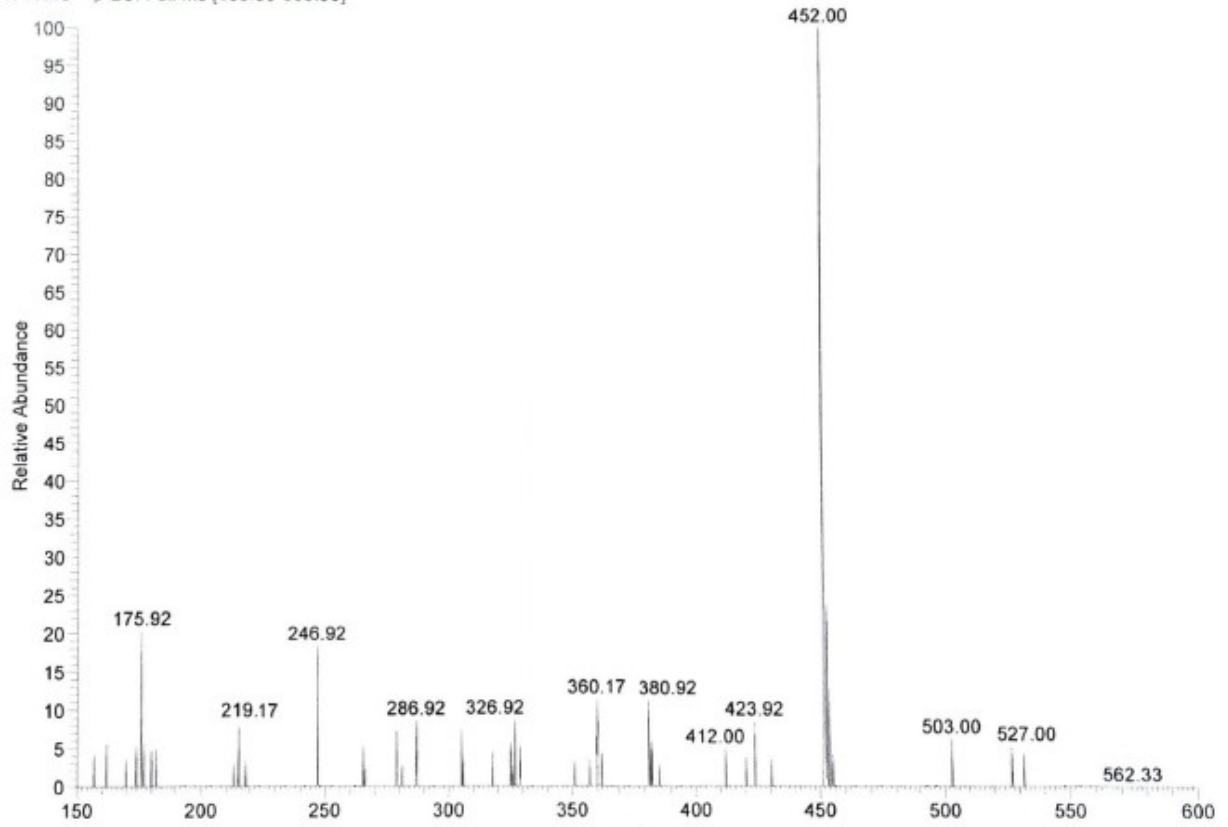

Compound 14

Eu-OX-Tri-2,4-Di-F, #1 RT: 0.00 AV: 1 NL: 9.42E2  
T: ITMS + p ESI Full ms [150.00-600.00]

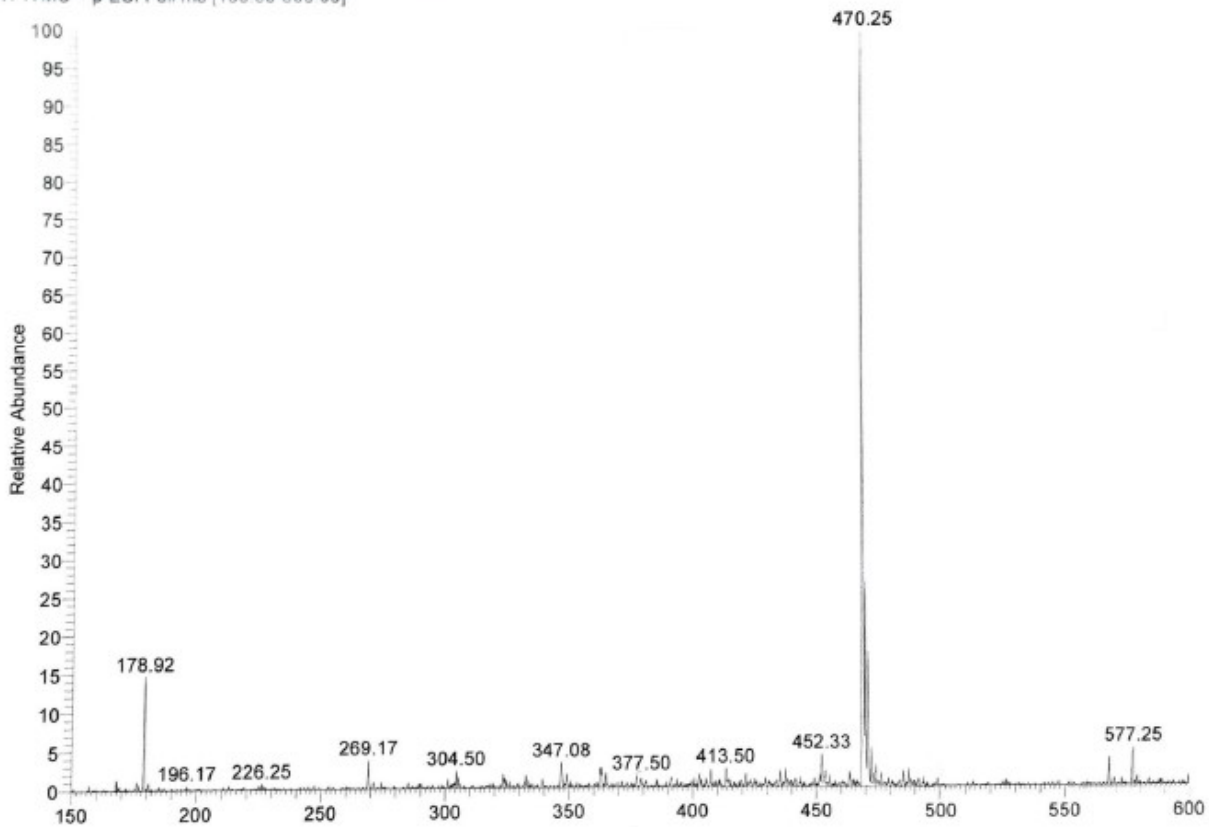

Compound 15

Eu-OX-Tri-2,4-di-Cl#1 RT: 0.00 AV: 1 NL: 1.85E2  
T: ITMS + p ESI Full ms [150.00-600.00]

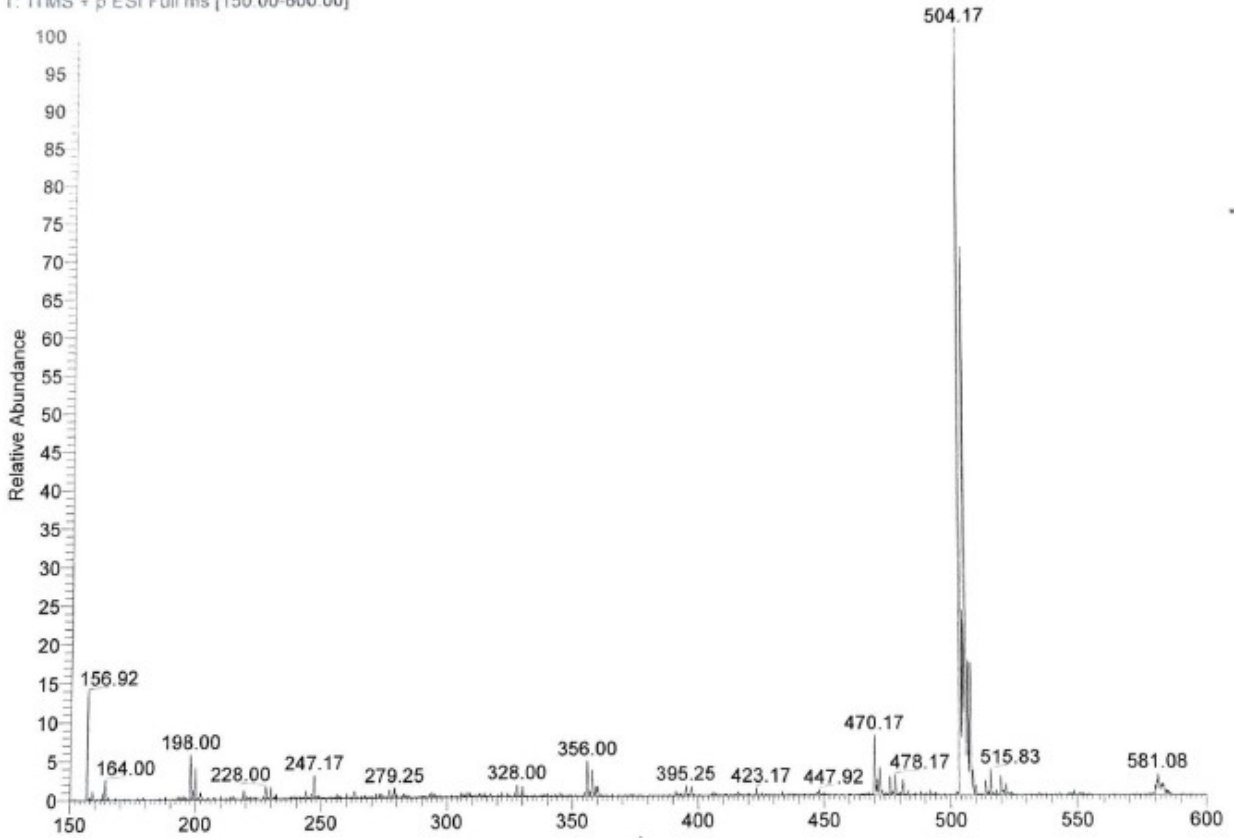

Compound 16

Eu-OX-S-Me' #1 RT: 0.00 AV: 1 NL: 2.16E2  
T: ITMS + p ESI Full ms [150.00-600.00]

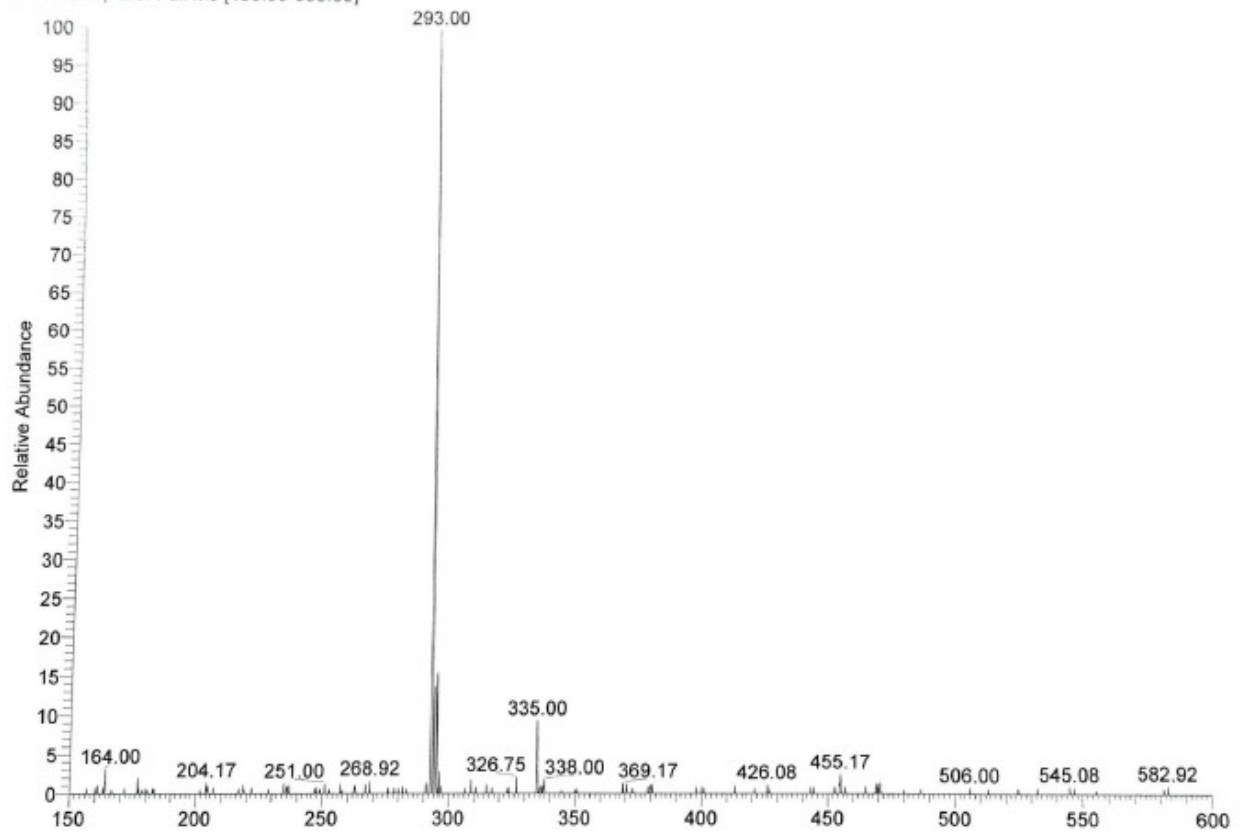

Compound 17

Eu-OX-S-Ethyl #1 RT: 0.00 AV: 1 NL: 1.60E3  
T: ITMS + p ESI Full ms [150.00-600.00]

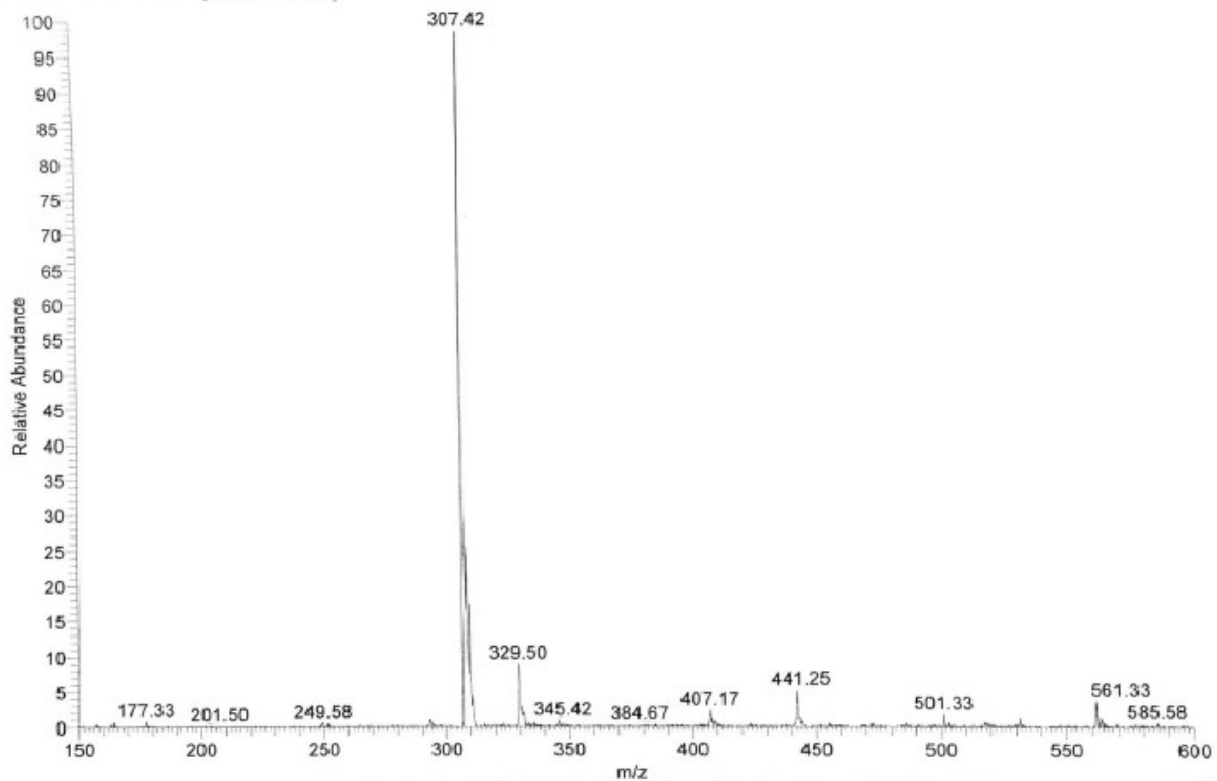

Compound 18



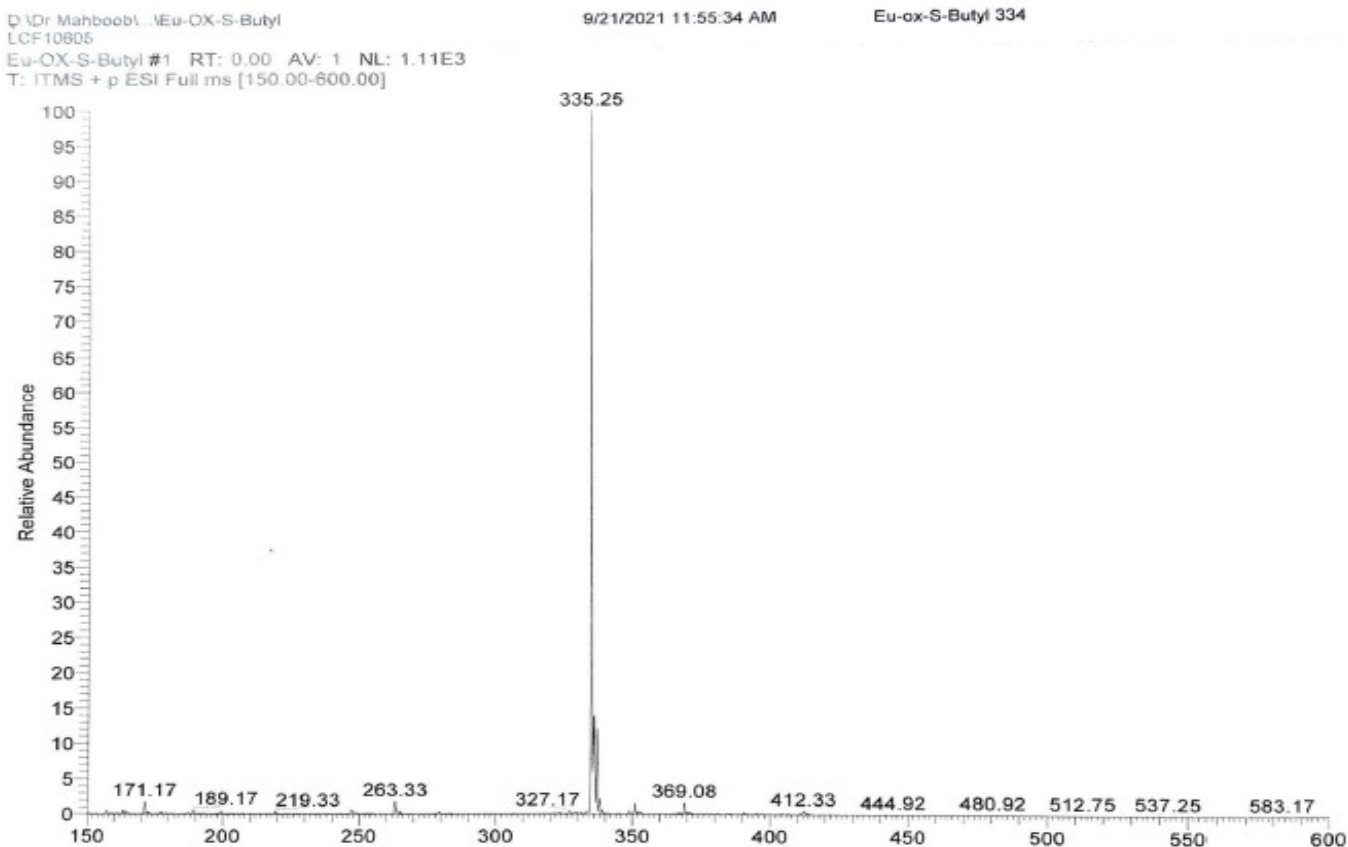

**Compound 19**

## Experimental

### Ligand preparation:

The DFT Calculations have been performed foremostly using the Jaguar<sup>[1]</sup>. DFT simulations have been utilized for geometrical optimizations of studied structures, employing the B3LYP/ 6-311G\*\*(d,p) exchange-correlation functional<sup>[2]</sup>with TD-DFT measurements used for the simulations frontier molecular orbital and molecular electrostatic maps.

### Protein formulation and active site prediction:

<sup>1</sup>Schrödinger Maestro | Schrödinger. *Schrödinger Release 2018-1* 2018.

<sup>2</sup>Ha, N. Van; Dat, D.T.; Nguyet, T.T. Stereoelectronic Properties of 1,2,4-Triazole-Derived N-heterocyclic Carbenes - A Theoretical Study. *VNU J. Sci. Nat. Sci. Technol.* **2019**, *35*, doi:10.25073/2588-1140/vnunst.4935.

3D crystal structure of TM protein was obtained from the Protein Data Bank. Charges with bond orders were assigned, H atoms were added to heavy atoms. Then, selenomethionines and selenocysteines transferred to methionines and cysteines. All water molecules were removed. The OPLS force field used for protein minimization to set a maximum heavy atom 0.30 Å RMSD. The binding pockets of protein have been identified using the CASTp package. That applies the modern algorithmic and geometrical analysis for analyzing and validation the binding pockets.

### **Receptor Grid Generation and Molecular Docking**

The Glide software<sup>3</sup> was utilized for generation of Receptor grid and Docking simulation process. The created grid was parameterized using default software parameter( 1.00 van der Waals, 0.25 cut-off of charge), and submitted to OPLS force field. Then produced and centroid the definite cubic box(12 Å × 12 Å × 12 Å) into active site. This box was used for docking study which were carried out using extra precision and write XP descriptor information. This generates favourable ligand poses which are further screened through filters to examine spatial fit of the ligand in the active site. Ligand poses which pass through initial screening are subjected to evaluation and minimization of grid approximation”. Scoring was then carried on energy minimized poses to generate Glide score

---

<sup>3</sup>Murphy, R.B.; Repasky, M.P.; Greenwood, J.R.; Tubert-Brohman, I.; Jerome, S.; Annabhimoju, R.; Boyles, N.A.; Schmitz, C.D.; Abel, R.; Farid, R.; et al. WScore: A Flexible and Accurate Treatment of Explicit Water Molecules in Ligand-Receptor Docking. *J. Med. Chem.* **2016**, doi:10.1021/acs.jmedchem.6b00131.
